# Supplementary material
Source: PubMed Central journal article supplement (PMC3115630)

# Highly Stereoselective Brønsted Acid-Catalyzed Synthesis of Spirooxindole Pyrans

*Jingqi Wang, Erika Crane and Karl A. Scheidt\**

Department of Chemistry, Center for Molecular Innovation and Drug Discovery,  
Chemistry of Life Processes Institute, Northwestern University  
2145 Sheridan Road, Evanston, IL 60208

## Supporting Information

### Table of Contents

|                                                                             |     |
|-----------------------------------------------------------------------------|-----|
| Table of Contents .....                                                     | S1  |
| General Information .....                                                   | S2  |
| General Procedure for the Synthesis of Spiro-oxindoles .....                | S2  |
| Selected NMR Spectra .....                                                  | S12 |
| HPLC Traces of Racemic and Enantioenriched Compounds .....                  | S31 |
| Determination of Absolute Stereochemistry of <b>4h</b> and <b>10b</b> ..... | S33 |

## General Information

All reactions were carried out under a nitrogen atmosphere in oven-dried glassware with magnetic stirring. THF, toluene, and DMF were purified by passage through a bed of activated alumina.<sup>1</sup> Reagents were purified prior to use unless otherwise stated following the guidelines of Perrin and Armarego.<sup>2</sup> Purification of reaction products was carried out by flash chromatography using EM Reagent silica gel 60 (230-400 mesh). Analytical thin layer chromatography was performed on EM Reagent 0.25 mm silica gel 60-F plates. Visualization was accomplished with UV light and ceric ammonium nitrate stain or potassium permanganate stain followed by heating. Infrared spectra were recorded on a Bruker Tensor 37 FT-IR spectrometer. <sup>1</sup>H-NMR spectra were recorded on a Bruker Avance 500 (500 MHz) spectrometer and are reported in ppm using solvent as an internal standard (CDCl<sub>3</sub> at 7.26 ppm). Data are reported as (ap = apparent, s = singlet, d = doublet, t = triplet, q = quartet, m = multiplet, b = broad; coupling constant(s) in Hz; integration. Proton-decoupled <sup>13</sup>C-NMR spectra were recorded on a Bruker Avance 500 (125 MHz) spectrometer and are reported in ppm using solvent as an internal standard (CDCl<sub>3</sub> at 77.1 ppm). Mass spectra data were obtained on a Varian 1200 Quadrupole Mass Spectrometer and Micromass Quadro II Spectrometer. The microwave reaction was carried with a single mode microwave reactor from Biotage.

All β-hydroxy-dioxinones were prepared in the same manner as described in former paper published from our group.<sup>3</sup> All isatin dimethyl acetals were prepared by the method reported by Butenschön.<sup>4</sup>

## General Procedure for the Synthesis of Spiro-oxindoles

A 10 mL round bottom flask was charged with powdered 5 Å molecular sieves (250 mg) and flame-dried prior to use. A solution of isatin dimethyl acetal (0.12 mmol, 1 equiv.) and hydroxy dioxinone (0.18 mmol, 1.5 equiv.) in CH<sub>2</sub>Cl<sub>2</sub> (2.5 mL) was added to the flask and cooled to 0 °C, then trifluorosulfonic acid (0.024 mmol, 0.2 equiv.) in CH<sub>2</sub>Cl<sub>2</sub> was added dropwise. The resulted reaction mixture was stirred for 30 min at 0 °C before warming up to 20 °C (room temperature) over 2 hours and then quenched by the addition of saturated sodium bicarbonate (3 mL). The layers were separated and aqueous layer was extracted with CH<sub>2</sub>Cl<sub>2</sub> (3 x 2 mL). The combined organic layers were dried over Na<sub>2</sub>SO<sub>4</sub>, filtered, concentrated in vacuo. The crude product was purified by flash chromatography with EtOAc/hexanes to afford the corresponding spiro-oxindole products.

---

[1] A. B. Pangborn, M. A. Giardello, R. H. Grubbs, R. K. Rosen, F. J. Timmers, *Organometallics* **1996**, *15*, 1518.

[2] D. D. Perrin, W. L. Armarego, *Purification of Laboratory Chemicals*; 3rd Ed., Pergamon Press, Oxford, 1988.

[3] W. J. Morris, D. W. Custar, K. A. Scheidt, *Org. Lett.* **2005**, *7*, 1113.

[4] B. Muschalek, I. Weidner, H. Butenschön, *J. Organomet. Chem.* **2007**, *692*, 2415.

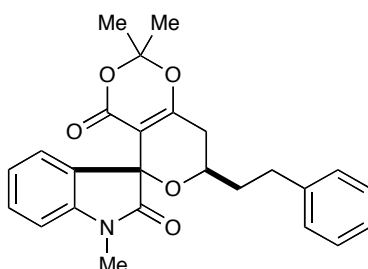

**Spiro-oxindole 4a:** Purified by flash chromatography using 20% ethyl acetate/hexanes to afford 35 mg (93% yield) of **4a** (20:1 dr) as a light yellowish solid.  $R_f = 0.24$  (33% ethyl acetate/hexanes); Analytical data for **4a**: FTIR (film)  $\tilde{\nu} = 2938, 1722, 1650, 1614, 1416, 1203, 1091, 733 \text{ cm}^{-1}$ ;  $^1\text{H NMR}$  (500 MHz;  $\text{CDCl}_3$ ):  $\delta$  7.44 (td,  $J = 7.7, 1.1 \text{ Hz}$ , 1H), 7.37 (t,  $J = 7.5 \text{ Hz}$ , 2H), 7.29-7.25 (m, 4H), 7.15 (t,  $J = 7.2 \text{ Hz}$ , 1H), 6.96 (d,  $J = 7.8 \text{ Hz}$ , 1H), 5.02 (tt,  $J = 8.4, 4.2 \text{ Hz}$ , 1H), 3.35 (s, 3H), 2.88 (ddd,  $J = 14.3, 10.0, 4.8 \text{ Hz}$ , 1H), 2.76-2.70 (m, 1H), 2.51-2.49 (m, 2H), 2.06-2.04 (m, 1H), 1.95-1.92 (m, 1H), 1.81 (d,  $J = 12.7 \text{ Hz}$ , 6H);  $^{13}\text{C NMR}$  (125 MHz;  $\text{CDCl}_3$ ):  $\delta$  174.7, 165.6, 157.8, 144.6, 141.3, 130.2, 128.9, 128.2, 128.2, 125.8, 123.2, 122.7, 108.5, 106.4, 102.1, 75.5, 68.6, 36.7, 32.8, 31.2, 27.0, 26.2, 22.7. LRMS (ESI): Mass calcd for  $\text{C}_{25}\text{H}_{25}\text{NO}_5$   $[\text{M}+\text{H}]^+$ : 420; found 420.

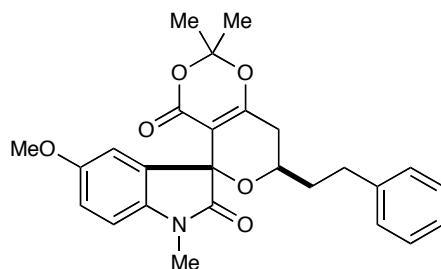

**Spiro-oxindole 4b:** Purified by flash chromatography using 20% ethyl acetate/hexanes to afford 48 mg (89% yield) of **4b** (20:1 dr) as a light reddish solid.  $R_f = 0.21$  (33% ethyl acetate/hexanes); Analytical data for **4b**: FTIR (film)  $\tilde{\nu} = 2940, 1719, 1649, 1495, 1416, 1287, 1037, 702 \text{ cm}^{-1}$ ;  $^1\text{H NMR}$  (500 MHz;  $\text{CDCl}_3$ ):  $\delta$  7.38-7.35 (m, 2H), 7.26 (dd,  $J = 10.2, 3.4 \text{ Hz}$ , 3H), 6.95 (dd,  $J = 8.5, 2.6 \text{ Hz}$ , 1H), 6.88-6.86 (m, 2H), 5.02 (tt,  $J = 7.9, 5.1 \text{ Hz}$ , 1H), 3.87 (s, 3H), 3.33 (s, 3H), 2.87 (ddd,  $J = 14.0, 10.5, 5.3 \text{ Hz}$ , 1H), 2.75-2.69 (m, 1H), 2.50-2.49 (m, 2H), 2.07-2.01 (m, 1H), 1.96-1.90 (m, 1H), 1.81 (d,  $J = 13.4 \text{ Hz}$ , 6H);  $^{13}\text{C NMR}$  (125 MHz;  $\text{CDCl}_3$ ):  $\delta$  174.7, 165.9, 158.0, 156.2, 141.6, 138.3, 130.4, 128.5, 128.5, 126.0, 124.8, 113.9, 111.6, 109.0, 106.7, 76.1, 69.0, 55.9, 37.0, 33.1, 31.4, 27.3, 26.6, 23.0.; LRMS (ESI): Mass calcd for  $\text{C}_{26}\text{H}_{27}\text{NO}_6$   $[\text{M}+\text{H}]^+$ : 450, found  $[\text{M}+\text{H}]^+$ : 450.

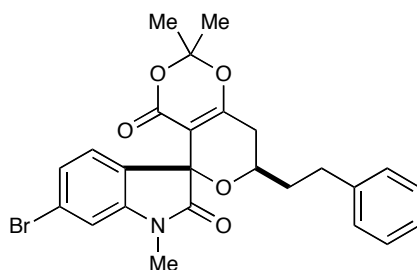

**Spiro-oxindole 4c:** Purified by flash chromatography using 20% ethyl acetate/hexanes to afford 48 mg (80% yield) of **4c** (20:1 dr) as a yellowish solid.  $R_f = 0.55$  (33% ethyl

acetate/hexanes); Analytical data for **4c**: FTIR (film)  $\tilde{\nu}$  = 2940, 1726, 1649, 1607, 1416, 1367, 1096, 708  $\text{cm}^{-1}$ ;  $^1\text{H}$  NMR (500 MHz;  $\text{CDCl}_3$ ):  $\delta$  7.39-7.36 (m, 2H), 7.30-7.25 (m, 4H), 7.12-7.11 (m, 2H), 5.00-4.95 (m, 1H), 3.34 (s, 3H), 2.86 (ddd,  $J$  = 14.0, 10.3, 5.2 Hz, 1H), 2.75-2.69 (m, 1H), 2.50-2.49 (m, 2H), 2.03 (dddd,  $J$  = 13.6, 10.4, 8.2, 5.4 Hz, 1H), 1.93 (dddd,  $J$  = 13.8, 10.5, 6.1, 4.7 Hz, 1H), 1.81 (d,  $J$  = 3.5 Hz, 6H);  $^{13}\text{C}$  NMR (125 MHz;  $\text{CDCl}_3$ ):  $\delta$  174.8, 166.1, 158.0, 146.2, 141.5, 128.5, 128.5, 128.1, 126.1, 125.7, 124.8, 124.1, 112.4, 106.8, 101.8, 75.4, 67.0, 38.0, 33.0, 31.4, 27.3, 26.6, 23.0; LRMS (ESI): Mass calcd for  $\text{C}_{25}\text{H}_{24}\text{BrNO}_5$   $[\text{M}+\text{H}]^+$ : 498; found 498.

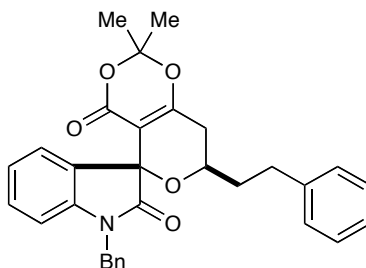

**Spiro-oxindole 4d**: Purified by flash chromatography using 20% ethyl acetate/hexanes to afford 42 mg (71% yield) of **4d** (20:1 dr) as a light yellowish solid.  $R_f$  = 0.22 (33% ethyl acetate/hexanes); Analytical data for **4d**: FTIR (film)  $\tilde{\nu}$  = 2941, 1725, 1649, 1608, 1418, 1202, 921, 702  $\text{cm}^{-1}$ ;  $^1\text{H}$  NMR (500 MHz;  $\text{CDCl}_3$ ):  $\delta$  7.41 (d,  $J$  = 7.6 Hz, 2H), 7.34 (t,  $J$  = 7.6 Hz, 2H), 7.28-7.25 (m, 4H), 7.20-7.14 (m, 4H), 7.02 (d,  $J$  = 7.8 Hz, 1H), 6.80 (d,  $J$  = 1.7 Hz, 1H), 5.01 (d,  $J$  = 16.1 Hz, 1H), 4.92-4.86 (m, 2H), 2.79 (ddd,  $J$  = 14.2, 9.9, 4.8 Hz, 1H), 2.63 (ddd,  $J$  = 13.8, 10.1, 6.4 Hz, 1H), 2.42-2.40 (m, 2H), 1.97-1.89 (m, 1H), 1.84 (dddd,  $J$  = 14.0, 10.2, 6.3, 4.0 Hz, 1H), 1.73 (d,  $J$  = 4.5 Hz, 6H);  $^{13}\text{C}$  NMR (125 MHz;  $\text{CDCl}_3$ ):  $\delta$  174.9, 166.4, 158.2, 145.3, 141.5, 135.0, 129.0, 128.6, 128.5, 128.2, 127.8, 127.1, 126.1, 125.9, 124.9, 124.1, 113.3, 106.9, 101.6, 75.5, 69.0, 44.0, 37.1, 33.1, 31.5, 27.3, 23.0; LRMS (ESI): Mass calcd for  $\text{C}_{31}\text{H}_{29}\text{NO}_5$   $[\text{M}+\text{H}]^+$ : 496, found  $[\text{M}+\text{H}]^+$ : 496.

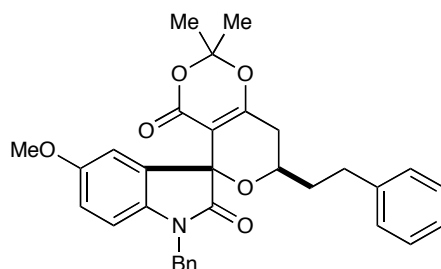

**Spiro-oxindole 4e**: Purified by flash chromatography using 20% ethyl acetate/hexanes to afford 58 mg (94% yield) of **4e** (20:1 dr) as a light yellowish solid.  $R_f$  = 0.40 (33% ethyl acetate/hexanes); Analytical data for **4e**: FTIR (film)  $\tilde{\nu}$  = 2939, 1718, 1648, 1495, 1417, 1272, 1179, 1018, 700  $\text{cm}^{-1}$ ;  $^1\text{H}$  NMR (500 MHz;  $\text{CDCl}_3$ ):  $\delta$  7.42 (d,  $J$  = 7.6 Hz, 2H), 7.33-7.30 (m, 2H), 7.28-7.24 (m, 3H), 7.18-7.15 (m, 3H), 6.77 (d,  $J$  = 2.6 Hz, 1H), 6.71-6.69 (m, 1H), 6.54 (d,  $J$  = 8.5 Hz, 1H), 5.05 (d,  $J$  = 16.0 Hz, 1H), 4.96 (tt,  $J$  = 8.6, 4.3 Hz, 1H), 4.87 (d,  $J$  = 16.0 Hz, 1H), 3.72 (s, 3H), 2.81 (ddd,  $J$  = 14.0, 10.3, 5.1 Hz, 1H), 2.65 (ddd,  $J$  = 13.9, 10.2, 6.2 Hz, 1H), 2.43-2.41 (m, 2H), 1.96 (dddd,  $J$  = 13.7, 10.3, 8.4, 5.3 Hz, 1H), 1.88-1.81 (m, 1H), 1.73 (d,  $J$  = 14.4 Hz, 6H);  $^{13}\text{C}$  NMR (125 MHz;  $\text{CDCl}_3$ ):  $\delta$

174.8, 166.2, 158.2, 156.2, 141.6, 137.2, 135.7, 130.4, 128.8, 128.5, 128.5, 127.5, 127.2, 126.0, 113.9, 111.5, 110.3, 106.8, 102.1, 76.2, 68.9, 55.8, 44.0, 37.1, 33.2, 31.5, 27.3, 23.0; LRMS (ESI): Mass calcd for C<sub>32</sub>H<sub>31</sub>NO<sub>6</sub> [M+H]<sup>+</sup>: 526, found [M+H]<sup>+</sup>: 526.

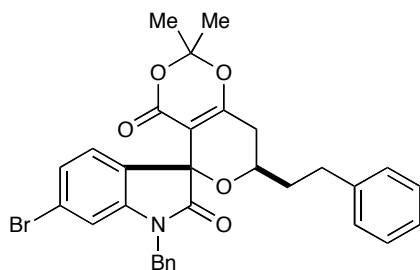

**Spiro-oxindole 4f:** Purified by flash chromatography using 20% ethyl acetate/hexanes to afford 56 mg (81% yield) of **4f** (20:1 dr) as a yellowish solid.  $R_f = 0.35$  (33% ethyl acetate/hexanes); Analytical data for **4f**: FTIR (film)  $\tilde{\nu} = 2940, 1724, 1649, 1613, 1468, 1351, 1170, 752, 698 \text{ cm}^{-1}$ ; <sup>1</sup>H NMR (500 MHz; CDCl<sub>3</sub>):  $\delta$  7.44 (d,  $J = 7.5 \text{ Hz}$ , 2H), 7.33 (t,  $J = 7.6 \text{ Hz}$ , 2H), 7.26 (qd,  $J = 7.4, 6.2 \text{ Hz}$ , 3H), 7.22-7.16 (m, 4H), 7.02 (t,  $J = 7.5 \text{ Hz}$ , 1H), 6.66 (d,  $J = 7.8 \text{ Hz}$ , 1H), 5.07 (d,  $J = 16.1 \text{ Hz}$ , 1H), 4.96 (dt,  $J = 8.6, 4.3 \text{ Hz}$ , 1H), 4.91 (d,  $J = 16.1 \text{ Hz}$ , 1H), 2.82 (ddd,  $J = 14.3, 10.0, 4.8 \text{ Hz}$ , 1H), 2.68-2.62 (m, 1H), 2.44-2.42 (m, 2H), 2.00-1.93 (m, 1H), 1.89-1.82 (m, 1H), 1.74 (d,  $J = 14.0 \text{ Hz}$ , 6H). <sup>13</sup>C NMR (125 MHz; CDCl<sub>3</sub>):  $\delta$  175.1, 166.1, 158.2, 143.9, 141.6, 135.6, 130.3, 129.2, 128.8, 128.5, 128.5, 127.5, 127.2, 126.0, 123.5, 123.0, 110.0, 106.8, 102.1, 75.9, 68.9, 43.9, 37.1, 33.2, 31.5, 27.4, 22.9; LRMS (ESI): Mass calcd for C<sub>31</sub>H<sub>28</sub>BrNO<sub>5</sub> [M+H]<sup>+</sup>: 574, found [M+H]<sup>+</sup>: 574.

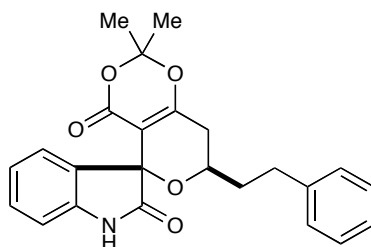

**Spiro-oxindole 4g:** Purified by flash chromatography using 20% ethyl acetate/hexanes to afford 35 mg (72% yield) of **4g** (20:1 dr) as a light yellowish solid.  $R_f = 0.18$  (33% ethyl acetate/hexanes); Analytical data for **4g**: IR (film)  $\tilde{\nu} = 3272, 2940, 1727, 1647, 1620, 1418, 1204, 752 \text{ cm}^{-1}$ ; <sup>1</sup>H NMR (500 MHz; CDCl<sub>3</sub>):  $\delta$  7.88 (s, 1H), 7.28-7.24 (m, 3H), 7.17-7.13 (m, 4H), 7.02 (td,  $J = 7.5, 0.9 \text{ Hz}$ , 1H), 6.87 (d,  $J = 7.8 \text{ Hz}$ , 1H), 4.85 (tt,  $J = 8.6, 4.3 \text{ Hz}$ , 1H), 2.78 (ddd,  $J = 14.3, 9.6, 5.1 \text{ Hz}$ , 1H), 2.64 (ddd,  $J = 13.9, 9.8, 6.5 \text{ Hz}$ , 1H), 2.41-2.38 (m, 2H), 1.98-1.91 (m, 1H), 1.87-1.81 (m, 1H), 1.72 (d,  $J = 16.2 \text{ Hz}$ , 6H); <sup>13</sup>C NMR (125 MHz; CDCl<sub>3</sub>):  $\delta$  176.5, 166.2, 158.4, 141.9, 141.5, 130.4, 129.6, 128.5, 128.5, 126.0, 124.0, 123.0, 110.7, 106.8, 102.1, 76.0, 68.8, 37.0, 33.1, 31.4, 27.4, 22.9; LRMS (ESI): Mass calcd for C<sub>24</sub>H<sub>23</sub>NO<sub>5</sub> [M+H]<sup>+</sup>: 406, found [M+H]<sup>+</sup>: 406.

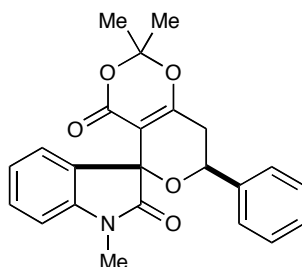

**Spiro-oxindole 4h:** Purified by flash chromatography using 20% ethyl acetate/hexanes to afford 38 mg (81% yield) of **4h** (20:1 d.r.) as a yellowish solid.  $R_f = 0.21$  (33% ethyl acetate/hexanes); Analytical data for **4h**: mp = 120-150 °C (decomp.); FTIR (film)  $\tilde{\nu} = 2939, 1720, 1650, 1613, 1416, 1274, 1091, 736 \text{ cm}^{-1}$ ;  $^1\text{H NMR}$  (500 MHz;  $\text{CDCl}_3$ ):  $\delta$  7.37 (d,  $J = 7.2 \text{ Hz}$ , 2H), 7.34-7.28 (m, 4H), 7.21 (d,  $J = 6.9 \text{ Hz}$ , 1H), 7.04 (t,  $J = 7.4 \text{ Hz}$ , 1H), 6.83 (d,  $J = 7.8 \text{ Hz}$ , 1H), 5.92 (dd,  $J = 10.5, 3.1 \text{ Hz}$ , 1H), 3.21 (s, 3H), 2.75 (dd,  $J = 18.0, 10.5 \text{ Hz}$ , 1H), 2.64 (dd,  $J = 18.0, 3.2 \text{ Hz}$ , 1H), 1.73 (d,  $J = 16.1 \text{ Hz}$ , 6H);  $^{13}\text{C NMR}$  (125 MHz;  $\text{CDCl}_3$ ):  $\delta$  174.9, 165.7, 158.0, 145.0, 139.7, 130.5, 128.9, 128.7, 128.5, 123.6, 123.0, 108.9, 106.9, 102.3, 77.4, 77.2, 76.9, 34.7, 27.4, 26.5, 23.0; LRMS (ESI): Mass calcd for  $\text{C}_{23}\text{H}_{21}\text{NO}_5$   $[\text{M}+\text{H}]^+$ : 392; found 392.

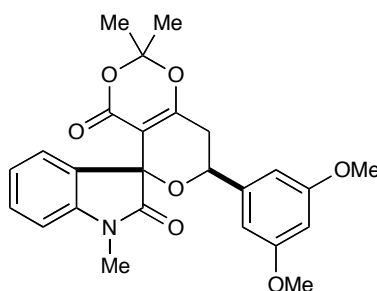

**Spiro-oxindole 4i:** Purified by flash chromatography using 20% ethyl acetate/hexanes to afford 34 mg (63% yield) of **4i** (20:1 dr) as a light yellowish solid.  $R_f = 0.25$  (33% ethyl acetate/hexanes); Analytical data for **4i**: FTIR (film)  $\tilde{\nu} = 2940, 1720, 1650, 1612, 1471, 1405, 1276, 1204, 1156, 923, 730 \text{ cm}^{-1}$ ;  $^1\text{H NMR}$  (500 MHz;  $\text{CDCl}_3$ ):  $\delta$  7.32 (td,  $J = 7.8, 1.2 \text{ Hz}$ , 1H), 7.20 (dd,  $J = 7.3, 0.9 \text{ Hz}$ , 1H), 7.04 (td,  $J = 7.5, 0.7 \text{ Hz}$ , 1H), 6.82 (d,  $J = 7.8 \text{ Hz}$ , 1H), 6.51 (d,  $J = 2.3 \text{ Hz}$ , 2H), 6.37 (t,  $J = 2.3 \text{ Hz}$ , 1H), 5.84 (dd,  $J = 10.4, 3.2 \text{ Hz}$ , 1H), 3.75 (s, 6H), 3.21 (s, 3H), 2.72 (dd,  $J = 18.0, 10.5 \text{ Hz}$ , 1H), 2.61 (dd,  $J = 18.0, 3.3 \text{ Hz}$ , 1H), 1.74 (d,  $J = 13.8 \text{ Hz}$ , 6H).  $^{13}\text{C NMR}$  (125 MHz;  $\text{CDCl}_3$ ):  $\delta$  174.8, 165.6, 161.0, 158.0, 145.0, 142.1, 130.5, 128.8, 123.6, 123.0, 108.8, 106.9, 104.5, 102.2, 100.1, 76.2, 70.8, 55.5, 34.7, 27.3, 26.5, 23.0; LRMS (ESI): Mass calcd for  $\text{C}_{25}\text{H}_{25}\text{NO}_7$   $[\text{M}+\text{H}]^+$ : 452, found  $[\text{M}+\text{H}]^+$ : 452.

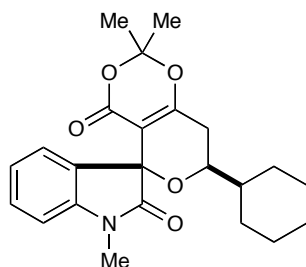

**Spiro-oxindole 4j:** Purified by flash chromatography using 20% ethyl acetate/hexanes to afford 42 mg (88% yield) of **4j** (20:1 dr) as a light yellowish oil.  $R_f = 0.50$  (33% ethyl acetate/hexanes); Analytical data for **4j**: FTIR (film)  $\tilde{\nu} = 2927, 2853, 1722, 1651, 1614, 1471, 1405, 1275, 1092, 732 \text{ cm}^{-1}$ ;  $^1\text{H NMR}$  (500 MHz;  $\text{CDCl}_3$ ):  $\delta$  7.31 (td,  $J = 7.7, 1.3$  Hz, 1H), 7.10 (dt,  $J = 7.3, 0.6$  Hz, 1H), 7.01 (td,  $J = 7.5, 0.8$  Hz, 1H), 6.83 (d,  $J = 7.8$  Hz, 1H), 4.61 (ddd,  $J = 9.4, 7.2, 4.0$  Hz, 1H), 3.22 (s, 3H), 2.42-2.33 (m, 2H), 1.85 (bd,  $J = 13.0$  Hz, 1H), 1.73-1.62 (m, 10H), 1.46 (tdt,  $J = 11.3, 7.5, 3.7$  Hz, 1H), 1.22-1.10 (m, 3H), 1.06-0.93 (m, 2H);  $^{13}\text{C NMR}$  (125 MHz;  $\text{CDCl}_3$ ):  $\delta$  175.2, 166.5, 158.1, 144.8, 130.3, 129.3, 123.4, 122.9, 108.7, 106.6, 102.4, 75.7, 73.1, 41.8, 30.4, 28.9, 27.9, 27.3, 26.5, 26.4, 26.0, 25.8, 23.0. LRMS (ESI): Mass calcd for  $\text{C}_{23}\text{H}_{27}\text{NO}_5$   $[\text{M}+\text{H}]^+$ : 398, found  $[\text{M}+\text{H}]^+$ : 398.

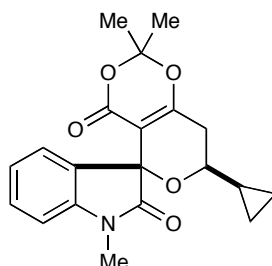

**Spiro-oxindole 4k:** Purified by flash chromatography using 20% ethyl acetate/hexanes to afford 28 mg (66% yield) of **4k** (20:1 dr) as a light yellowish oil.  $R_f = 0.45$  (33% ethyl acetate/hexanes); Analytical data for **4k**: FTIR (film)  $\tilde{\nu} = 3001, 2940, 1719, 1651, 1614, 1417, 1276, 1091, 753 \text{ cm}^{-1}$ ;  $^1\text{H NMR}$  (500 MHz;  $\text{CDCl}_3$ ):  $\delta$  7.30 (td,  $J = 7.7, 1.3$  Hz, 1H), 7.15-7.14 (m, 1H), 7.02 (td,  $J = 7.7, 1.3$  Hz, 1H), 6.83 (d,  $J = 7.8$  Hz, 1H), 4.11 (ddd,  $J = 10.1, 9.0, 3.1$  Hz, 1H), 3.21 (s, 3H), 2.57 (dd,  $J = 18.0, 10.2$  Hz, 1H), 2.48 (dd,  $J = 18.0, 3.2$  Hz, 2H), 1.70 (d,  $J = 14.3$  Hz, 6H), 0.96-0.91 (m, 1H), 0.57-0.54 (m, 2H), 0.43-0.40 (m, 1H), 0.27 (m, 1H).  $^{13}\text{C NMR}$  (125 MHz;  $\text{CDCl}_3$ ):  $\delta$  175.0, 166.0, 158.1, 144.9, 130.4, 129.0, 123.5, 123.0, 108.8, 106.7, 102.2, 76.0, 74.3, 33.0, 27.3, 26.5, 23.0, 15.2, 4.0, 2.3. LRMS (ESI): Mass calcd for  $\text{C}_{20}\text{H}_{21}\text{NO}_5$   $[\text{M}+\text{H}]^+$ : 356, found  $[\text{M}+\text{H}]^+$ : 356.

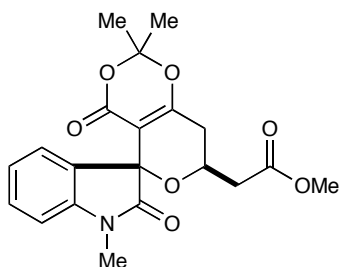

**Spiro-oxindole 4l:** Purified by flash chromatography using 20% ethyl acetate/hexanes to afford 32 mg (69% yield) of **4l** (20:1 dr) as a light yellowish oil.  $R_f = 0.15$  (33% ethyl acetate/hexanes); Analytical data for **4l**: FTIR (film)  $\tilde{\nu} = 2950, 1722, 1650, 1614, 1411, 1276, 1204, 1091, 755 \text{ cm}^{-1}$ ;  $^1\text{H NMR}$  (500 MHz;  $\text{CDCl}_3$ ):  $\delta$  7.32 (td,  $J = 7.7, 1.3 \text{ Hz}$ , 1H), 7.11 (dt,  $J = 7.4, 0.6 \text{ Hz}$ , 1H), 7.02 (td,  $J = 7.5, 0.8 \text{ Hz}$ , 1H), 6.83 (d,  $J = 7.8 \text{ Hz}$ , 1H), 5.29-5.24 (m, 1H), 3.65 (s, 3H), 3.22 (s, 3H), 2.69 (dd,  $J = 15.9, 5.7 \text{ Hz}$ , 1H), 2.61-2.49 (m, 3H), 1.70 (d,  $J = 6.5 \text{ Hz}$ , 6H).  $^{13}\text{C NMR}$  (125 MHz;  $\text{CDCl}_3$ ):  $\delta$  174.6, 170.2, 165.3, 157.9, 144.9, 130.6, 128.7, 123.5, 123.0, 108.8, 106.8, 102.0, 75.7, 65.7, 52.0, 39.8, 32.5, 27.3, 26.5, 23.0; LRMS (ESI): Mass calcd for  $\text{C}_{20}\text{H}_{21}\text{NO}_7$   $[\text{M}+\text{H}]^+$ : 388, found 388.

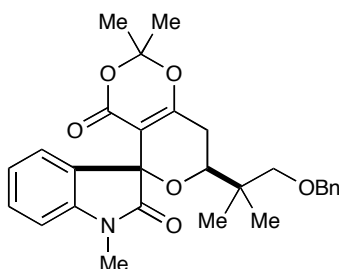

**Spiro-oxindole 4m:** Purified by flash chromatography using 20% ethyl acetate/hexanes to afford 38 mg (66% yield) of **4m** (20:1 dr) as a light yellowish oil.  $R_f = 0.48$  (33% ethyl acetate/hexanes); Analytical data for **4m**: FTIR (film)  $\tilde{\nu} = 2963, 2936, 2875, 1722, 1650, 1614, 1404, 1276, 1202, 1092, 751 \text{ cm}^{-1}$ ;  $^1\text{H NMR}$  (500 MHz;  $\text{CDCl}_3$ ):  $\delta$  7.34-7.31 (m, 5H), 7.28 (dd,  $J = 6.2, 2.4 \text{ Hz}$ , 1H), 7.07 (dd,  $J = 7.1, 1.2 \text{ Hz}$ , 1H), 7.01 (td,  $J = 7.4, 0.9 \text{ Hz}$ , 1H), 6.84 (d,  $J = 7.8 \text{ Hz}$ , 1H), 4.73 (dd,  $J = 10.8, 2.9 \text{ Hz}$ , 1H), 4.49 (d,  $J = 12.2 \text{ Hz}$ , 1H), 4.41 (d,  $J = 12.2 \text{ Hz}$ , 1H), 3.31 (d,  $J = 9.0 \text{ Hz}$ , 1H), 3.21 (s, 3H), 3.18 (d,  $J = 9.0 \text{ Hz}$ , 1H), 2.65 (dd,  $J = 17.9, 12.0 \text{ Hz}$ , 1H), 2.32 (dd,  $J = 17.9, 2.9 \text{ Hz}$ , 1H), 1.69 (d,  $J = 5.2 \text{ Hz}$ , 6H), 0.96 (s, 3H), 0.90 (s, 3H).  $^{13}\text{C NMR}$  (125 MHz;  $\text{CDCl}_3$ ):  $\delta$  175.0, 167.0, 158.2, 144.9, 138.9, 130.2, 129.5, 128.4, 127.5, 127.5, 123.5, 122.7, 108.6, 106.6, 102.2, 76.3, 75.6, 73.5, 73.4, 38.0, 28.5, 27.3, 26.4, 23.0, 21.1, 21.0; LRMS (ESI): Mass calcd for  $\text{C}_{28}\text{H}_{31}\text{NO}_6$   $[\text{M}+\text{H}]^+$ : 478; found 478.



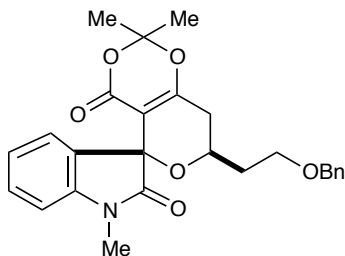

**Spiro-oxindole 4n:** Purified by flash chromatography using 20% ethyl acetate/hexanes to afford 20 mg (51% yield) of **4n** (20:1 dr) as a light yellowish oil.  $R_f = 0.31$  (33% ethyl acetate/hexanes); Analytical data for **4n**: FTIR (film)  $\tilde{\nu} = 2941, 2963, 1721, 1650, 1613, 1408, 1375, 1204, 1091, 752 \text{ cm}^{-1}$ ;  $^1\text{H NMR}$  (500 MHz;  $\text{CDCl}_3$ ):  $\delta$  7.34-7.31 (m, 5H), 7.29-7.26 (m, 1H), 7.12 (dd,  $J = 7.3, 1.1 \text{ Hz}$ , 1H), 7.03 (t,  $J = 7.5 \text{ Hz}$ , 1H), 6.84 (d,  $J = 7.8 \text{ Hz}$ , 1H), 5.02-4.99 (m, 1H), 4.46 (q,  $J = 9.6 \text{ Hz}$ , 2H), 3.59-3.51 (m, 2H), 3.22 (s, 3H), 2.46-2.44 (m, 2H), 1.96-1.83 (m, 2H), 1.70 (d,  $J = 7.6 \text{ Hz}$ , 6H).  $^{13}\text{C NMR}$  (125 MHz;  $\text{CDCl}_3$ ):  $\delta$  174.9, 165.6, 157.8, 144.7, 138.4, 130.5, 129.1, 128.5, 127.7, 127.2, 123.1, 122.8, 109.0, 106.5, 102.2, 75.4, 73.1, 67.2, 66.8, 35.1, 33.0, 27.3, 26.1, 23.0; LRMS (ESI): Mass calcd for  $\text{C}_{26}\text{H}_{27}\text{NO}_6$   $[\text{M}+\text{H}]^+$ : 450; found 450.

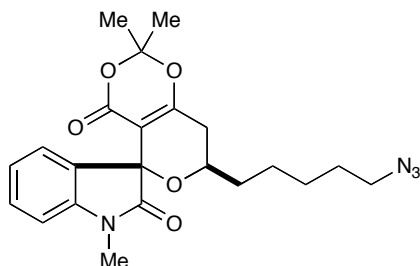

**Spiro-oxindole 4o:** Purified by flash chromatography using 20% ethyl acetate/hexanes to afford 29 mg (57% yield) of **4o** (20:1 dr) as a light yellowish oil.  $R_f = 0.45$  (33% ethyl acetate/hexanes); Analytical data for **4o**: FTIR (film)  $\tilde{\nu} = 2939, 2862, 2095, 1719, 1650, 1613, 1406, 1275, 1091, 753 \text{ cm}^{-1}$ ;  $^1\text{H NMR}$  (500 MHz;  $\text{CDCl}_3$ ):  $\delta$  7.32 (td,  $J = 7.7, 1.3 \text{ Hz}$ , 1H), 7.12 (dd,  $J = 7.2, 1.0 \text{ Hz}$ , 1H), 7.03 (td,  $J = 7.5, 0.9 \text{ Hz}$ , 1H), 6.84 (d,  $J = 7.8 \text{ Hz}$ , 1H), 4.84 (td,  $J = 6.5, 2.6 \text{ Hz}$ , 1H), 3.26-3.21 (m, 5H), 2.38-2.36 (m, 2H), 1.70 (d,  $J = 9.4 \text{ Hz}$ , 6H), 1.61-1.52 (m, 4H), 1.39-1.33 (m, 4H).  $^{13}\text{C NMR}$  (125 MHz;  $\text{CDCl}_3$ ):  $\delta$  175.1, 165.9, 158.1, 144.8, 130.4, 129.1, 123.4, 123.0, 108.8, 106.7, 102.3, 75.8, 69.1, 51.4, 35.0, 33.1, 28.8, 27.3, 26.6, 26.5, 24.7, 22.9; LRMS (ESI): Mass calcd for  $\text{C}_{22}\text{H}_{26}\text{N}_4\text{O}_5$   $[\text{M}+\text{H}]^+$ : 427; found 427.

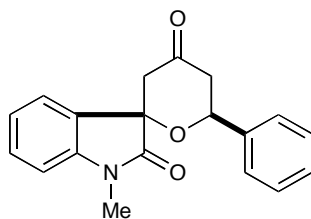

**Pyranone 5:** A solution of **4h** (30 mg, 0.08 mmol) in DMSO (4 mL) and  $\text{H}_2\text{O}$  (0.5 mL) was heated to  $120 \text{ }^\circ\text{C}$  (bath temperature) for 24 hours. The mixture was then cooled to room temperature and diluted with brine (10 mL) and extracted with EtOAc (3 x 3mL).

The combined organic layers were filtered, concentrated and purified by flash chromatography (15% ethyl acetate/hexanes) to yield 22 mg (93%) of **5** as a yellowish oil.  $R_f = 0.18$  (20% ethyl acetate/hexanes); Analytical data for **5**: FTIR (film)  $\tilde{\nu} = 2922, 1722, 1615, 1471, 1375, 1094, 752 \text{ cm}^{-1}$ ;  $^1\text{H NMR}$  (500 MHz;  $\text{CDCl}_3$ ):  $\delta$  7.47 (dd,  $J = 7.4, 0.8 \text{ Hz}$ , 1H), 7.42-7.40 (m, 2H), 7.38-7.29 (m, 3H), 7.15 (d,  $J = 0.8 \text{ Hz}$ , 1H), 6.83 (d,  $J = 7.8 \text{ Hz}$ , 1H), 5.97 (dd,  $J = 11.1, 3.2 \text{ Hz}$ , 1H), 3.17 (s, 3H), 2.95 (dd,  $J = 14.9, 0.8 \text{ Hz}$ , 1H), 2.86 (ddd,  $J = 14.9, 3.2, 1.9 \text{ Hz}$ , 1H), 2.74 (ddd,  $J = 14.9, 11.1, 0.8 \text{ Hz}$ , 1H), 2.54 (dd,  $J = 14.9, 1.9 \text{ Hz}$ , 1H);  $^{13}\text{C NMR}$  (125 MHz;  $\text{CDCl}_3$ ):  $\delta$  203.6, 174.5, 143.4, 140.8, 130.7, 128.8, 128.4, 127.8, 126.2, 124.1, 123.6, 108.9, 78.2, 73.7, 49.0, 45.8, 26.1. LRMS (ESI): Mass calcd for  $\text{C}_{19}\text{H}_{17}\text{NO}_3$   $[\text{M}+\text{H}]^+$ : 308; found 308.

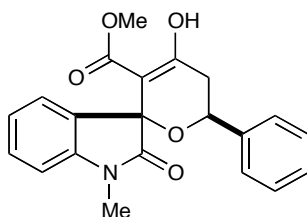

**Ketoester 6:** A septum-sealed microwave tube charged with spiro-oxindole **4h** (50 mg, 0.128 mmol) and MeOH (0.05 mL, 1.28 mmol) in toluene (2 mL) was irradiated in a monomode microwave cavity at 160 °C for 2 h. The solvent was removed in vacuo and the crude product was purified by flash chromatography (30% ethyl acetate/hexanes) to yield 38 mg (81%) of **6** as a light yellowish solid.  $R_f = 0.25$  (33% ethyl acetate/hexanes); Analytical data for **6**: FTIR (film)  $\tilde{\nu} = 3059, 3033, 2921, 1719, 1660, 1615, 1471, 1220, 1092, 752 \text{ cm}^{-1}$ ;  $^1\text{H NMR}$  (500 MHz;  $\text{CDCl}_3$ ):  $\delta$  12.37 (s, 1H), 7.36 (dd,  $J = 8.3, 1.3 \text{ Hz}$ , 2H), 7.33-7.30 (m, 2H), 7.29-7.26 (m, 2H), 7.20 (dd,  $J = 7.3, 0.8 \text{ Hz}$ , 1H), 7.03 (td,  $J = 7.5, 0.9 \text{ Hz}$ , 1H), 6.77 (d,  $J = 7.7 \text{ Hz}$ , 1H), 5.77 (dd,  $J = 10.9, 2.9 \text{ Hz}$ , 1H), 3.40 (s, 3H), 3.19 (s, 3H), 2.86 (dd,  $J = 17.6, 10.9 \text{ Hz}$ , 1H), 2.68 (dd,  $J = 17.6, 3.0 \text{ Hz}$ , 1H);  $^{13}\text{C NMR}$  (125 MHz;  $\text{CDCl}_3$ ):  $\delta$  175.9, 173.5, 170.0, 144.5, 140.1, 130.7, 129.9, 128.6, 128.3, 126.6, 123.7, 123.0, 108.1, 97.5, 76.8, 70.7, 51.7, 36.4, 26.3; LRMS (ESI): Mass calcd for  $\text{C}_{21}\text{H}_{19}\text{NO}_5$   $[\text{M}+\text{H}]^+$ : 366; found 366.

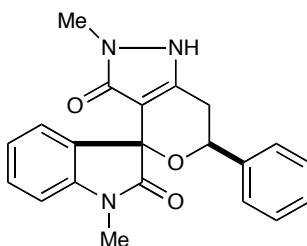

**Pyrazolone 7:** A septum-sealed microwave tube charged with spiro-oxindole **4h** (25 mg, 0.064 mmol) and MeOH (0.05 mL, 1.28 mmol) in toluene (2 mL) was irradiated in a monomode microwave cavity at 160 °C for 2 h. Then methyl hydrazine (0.02 mL, 0.41 mmol) was added and the reaction mixture was irradiated at 90 °C for an extra 30 min. The solvent was removed in vacuo and **7** (18 mg, 81%) was obtained as white prisms after washing with diethyl ether. Analytical data for **7**: IR (film)  $\tilde{\nu} = 3399, 2923, 2129, 1717, 1603, 1011, 750 \text{ cm}^{-1}$ ;  $^1\text{H NMR}$  (500 MHz;  $\text{CD}_3\text{OD}$ ):  $\delta$  7.42-7.40 (m, 2H), 7.38-

7.33 (m, 3H), 7.30-7.27 (m, 1H), 7.21 (dd,  $J = 7.4, 0.8$  Hz, 1H), 7.08 (td,  $J = 7.5, 0.9$  Hz, 1H), 7.00 (d,  $J = 7.8$  Hz, 1H), 5.80 (dd,  $J = 9.3, 4.8$  Hz, 1H), 3.39 (s, 3H), 3.22 (s, 3H), 2.94-2.92 (m, 2H);  $^{13}\text{C}$  NMR (125 MHz;  $\text{CD}_3\text{OD}$ ):  $\delta$  177.4, 147.2, 142.0, 131.3, 130.2, 129.6, 129.5, 129.1, 127.4, 125.7, 124.3, 110.0, 77.4, 73.5, 49.6, 30.9, 26.4; LRMS (ESI): Mass calcd for  $\text{C}_{21}\text{H}_{19}\text{N}_3\text{O}_3$   $[\text{M}+\text{H}]^+$ : 362; found 362.

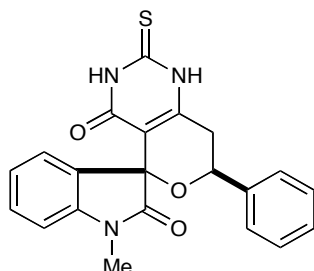

**Thio-pyrimidine-one 8:** A septum-sealed microwave tube charged with spiro-oxindole **4h** (50 mg, 0.128 mmol) and thiourea (97 mg, 1.28 mmol) in toluene (2 mL) was irradiated in a monomode microwave cavity at 160 °C for 4 h. The solvent was removed in vacuo and the crude product was purified by flash chromatography (30% ethyl acetate/hexanes) to yield 21 mg (42%) of **8** as a brownish solid.  $R_f = 0.21$  (33% ethyl acetate/hexanes); Analytical data for **8**: FTIR (film)  $\tilde{\nu} = 3218, 3159, 3059, 2932, 1724, 1653, 1614, 1569, 1470, 1374, 1200, 1129, 1024, 731$   $\text{cm}^{-1}$ ;  $^1\text{H}$  NMR (500 MHz;  $\text{CDCl}_3$ ):  $\delta$  11.74 (bs, 1H), 7.45-7.39 (m, 6H), 7.14 (d,  $J = 7.2$  Hz, 1H), 7.10 (t,  $J = 7.5$  Hz, 1H), 7.01 (t,  $J = 7.5$  Hz, 1H), 5.97 (bs, 1H), 5.73 (d,  $J = 9.2$  Hz, 1H), 2.77 (s, 3H), 2.66-2.59 (m, 1H), 2.43-2.38 (m, 1H);  $^{13}\text{C}$  NMR (125 MHz;  $\text{CDCl}_3$ ):  $\delta$  174.9, 174.3, 159.4, 151.9, 144.6, 139.7, 130.4, 129.1, 128.9, 128.1, 127.1, 123.8, 123.3, 109.9, 108.3, 76.4, 70.9, 33.2, 26.1; LRMS (ESI): Mass calcd for  $\text{C}_{21}\text{H}_{17}\text{N}_3\text{O}_3\text{S}$   $[\text{M}+\text{H}]^+$ : 392; found 392.

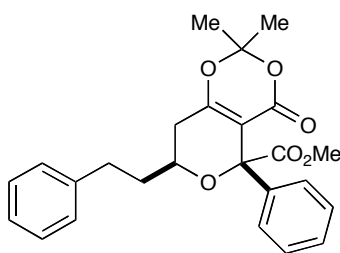

**Bicyclic dioxinone 10a:** Prepared according to the general procedure using 6-(2-hydroxy-4-phenylbutyl)-2,2-dimethyl-4H-1,3-dioxin-4-one (50 mg, 0.18 mmol) and methyl 2,2-dimethoxy-2-phenylethanoate (25 mg, 0.12 mmol) and purified by flash chromatography using 30% EtOAc/hexanes to afford 40 mg (79% yield) of **10a** (20:1 dr) as a yellow oil.  $R_f = 0.45$  (33% ethyl acetate/hexanes); Analytical data for **10a**: FTIR (film)  $\tilde{\nu} = 2924, 2853, 1730, 1644, 1404, 1273, 1205, 1011, 751$   $\text{cm}^{-1}$ ;  $^1\text{H}$  NMR (500 MHz;  $\text{CDCl}_3$ ):  $\delta$  7.56-7.54 (m, 2H), 7.35-7.27 (m, 5H), 7.21-7.17 (m, 3H), 3.97 (tdd,  $J = 7.5, 7.2, 4.0$  Hz, 1H), 3.81 (s, 3H), 2.86 (ddd,  $J = 14.1, 8.9, 5.3$  Hz, 1H), 2.71 (dt,  $J = 14.1, 8.1$  Hz, 1H), 2.42 (dd,  $J = 17.9, 10.6$  Hz, 1H), 2.30 (dd,  $J = 17.8, 3.2$  Hz, 1H), 2.07-2.01 (m, 1H), 1.97-1.90 (m, 1H), 1.66 (s, 3H), 1.50 (s, 3H);  $^{13}\text{C}$  NMR (125 MHz;  $\text{CDCl}_3$ ):  $\delta$  170.8, 163.4, 158.5, 141.4, 139.7, 128.6, 128.3, 127.8, 127.5, 126.1, 106.2,

106.1, 81.2, 70.1, 52.9, 36.9, 33.5, 31.2, 29.8, 27.1, 23.4; LRMS (ESI): Mass calcd for  $C_{25}H_{26}O_6$   $[M+H]^+$ : 423; found 423.

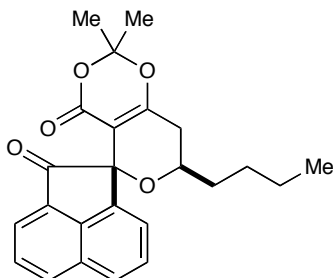

**Bicyclic dioxinone 10b:** Prepared according to the general procedure using 2,2-dimethoxyacenaphthylen-1-(2*H*)-one (50 mg, 0.22 mmol) and 6-(2-hydroxyhexyl)-2,2-dimethyl-4*H*-1,3-dioxin-4-one (75 mg, 0.33 mmol) and purified by flash chromatography using 30% EtOAc/hexanes to afford 71 mg (82% yield) of **10b** (20:1 dr) as a white solid.  $R_f$  = 0.77 (33% ethyl acetate/hexanes); Analytical data for **10b**: mp = 120-150 °C (decomp.); FTIR (film)  $\tilde{\nu}$  = 2955, 2934, 2870, 1723, 1650, 1406, 1276, 1202, 1009, 786  $cm^{-1}$ ;  $^1H$  NMR (500 MHz;  $CDCl_3$ ):  $\delta$  8.09 (d,  $J$  = 8.2 Hz, 1H), 7.99 (d,  $J$  = 7.0 Hz, 1H), 7.89 (d,  $J$  = 8.3 Hz, 1H), 7.73 (dd,  $J$  = 8.1, 7.0 Hz, 1H), 7.63 (dd,  $J$  = 8.3, 6.9 Hz, 1H), 7.44 (d,  $J$  = 6.9 Hz, 1H), 4.79-4.74 (m, 1H), 2.46-2.44 (m, 2H), 1.78 (s, 3H), 1.72 (s, 3H), 1.61-1.55 (m, 1H), 1.53-1.47 (m, 1H), 1.31-1.23 (m, 4H), 0.83 (t,  $J$  = 7.1 Hz, 3H).  $^{13}C$  NMR (125 MHz;  $CDCl_3$ ):  $\delta$  201.7, 166.1, 158.5, 142.5, 139.4, 131.6, 131.5, 130.9, 128.6, 128.4, 126.0, 122.3, 119.9, 106.6, 102.9, 79.1, 70.1, 34.9, 33.3, 27.3, 27.2, 22.9, 22.6, 14.0. LRMS (ESI): Mass calcd for  $C_{24}H_{24}O_5$   $[M+H]^+$ : 393; found 393.

## Selected NMR Spectra

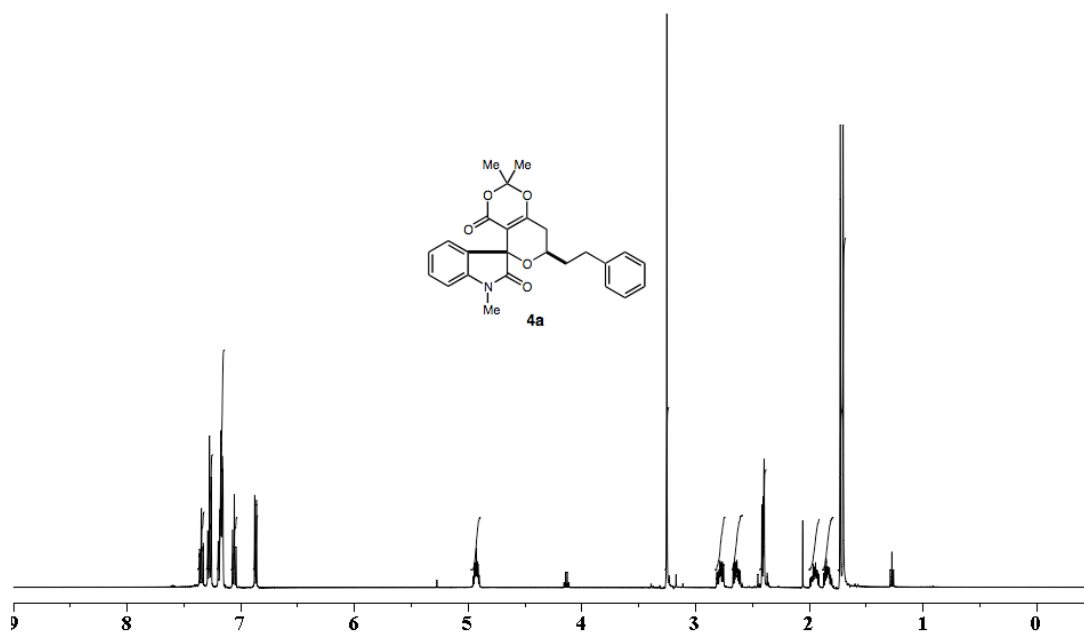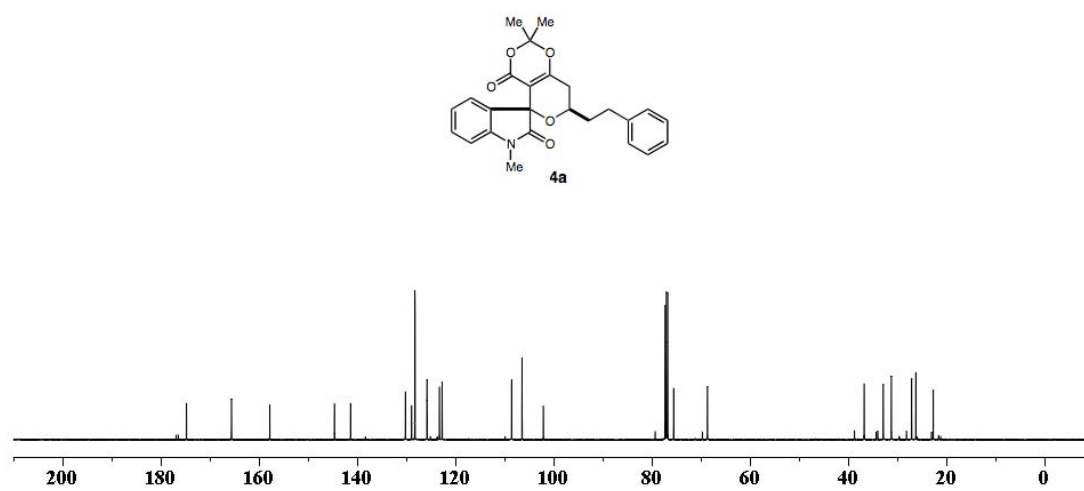

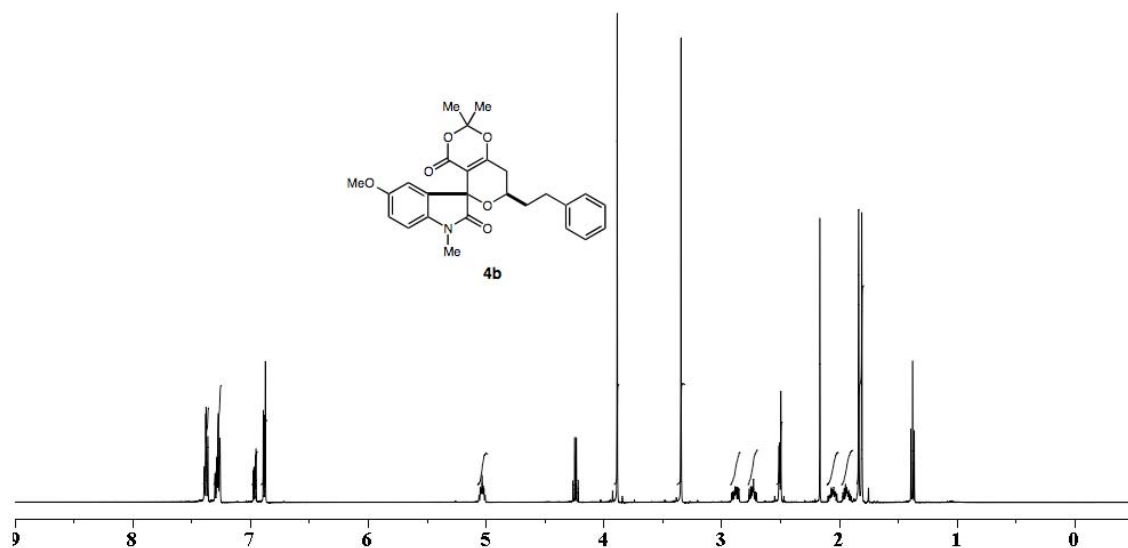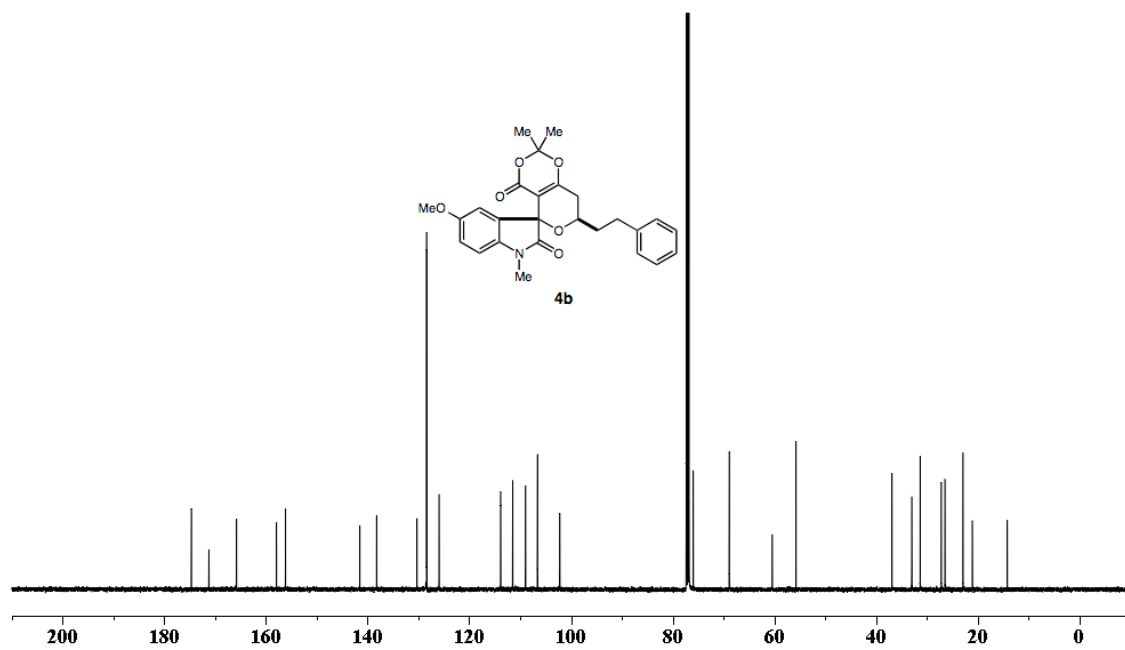

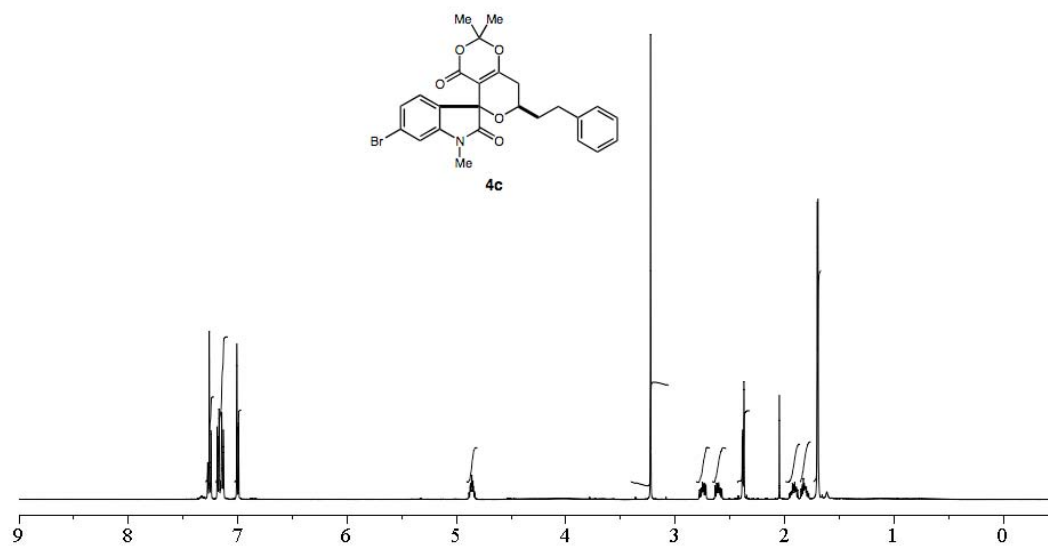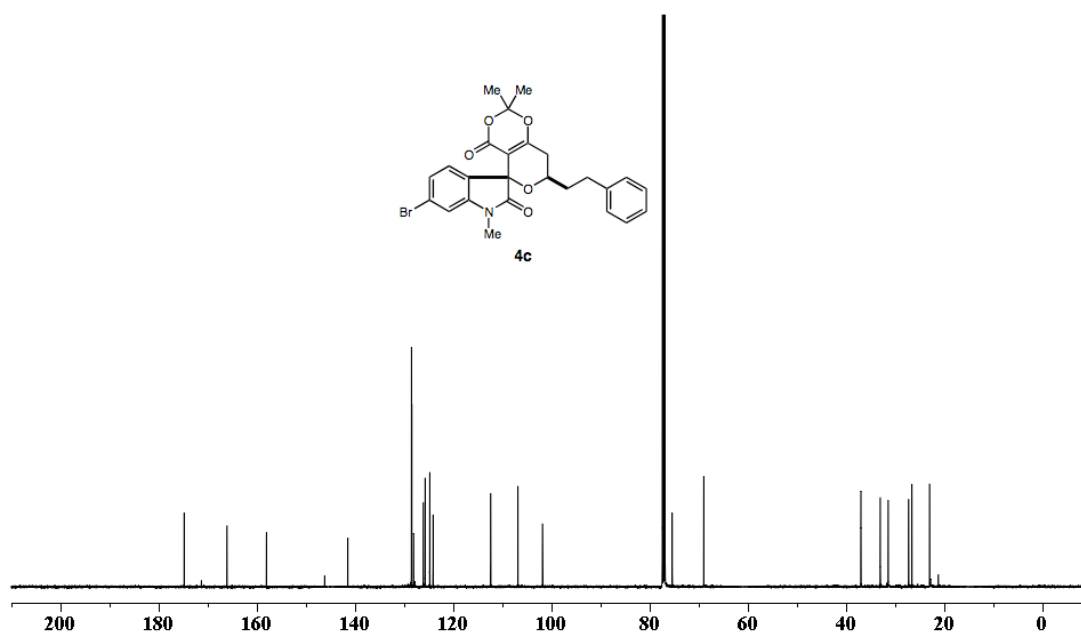

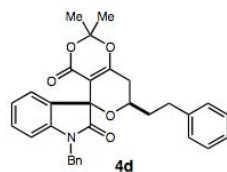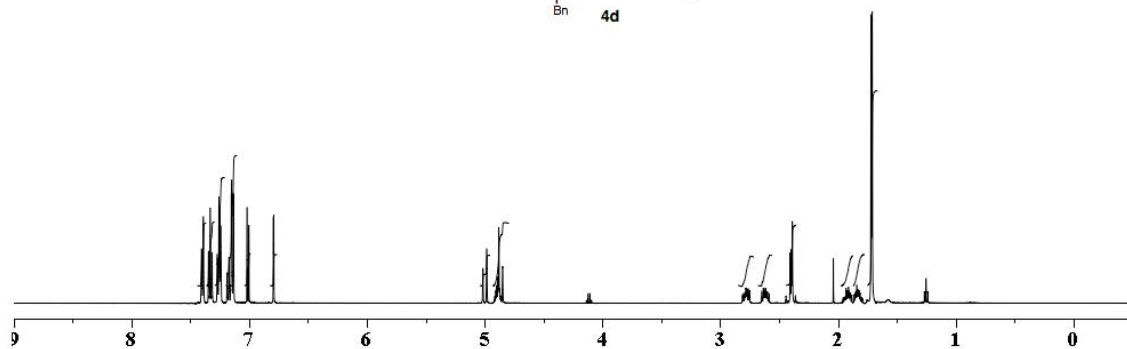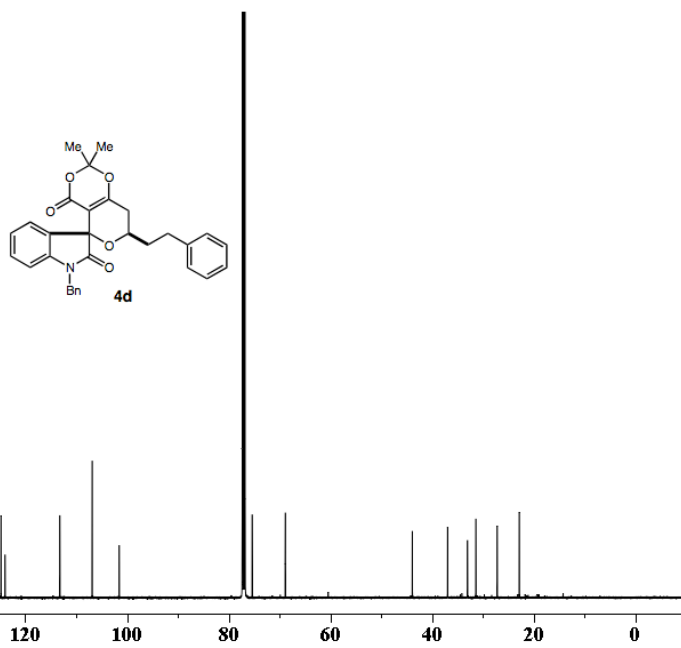



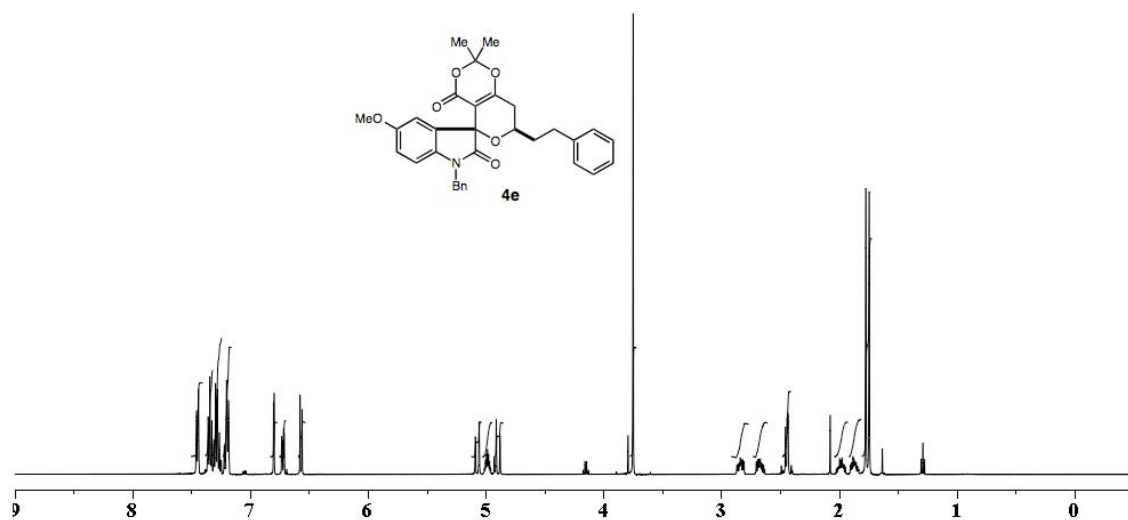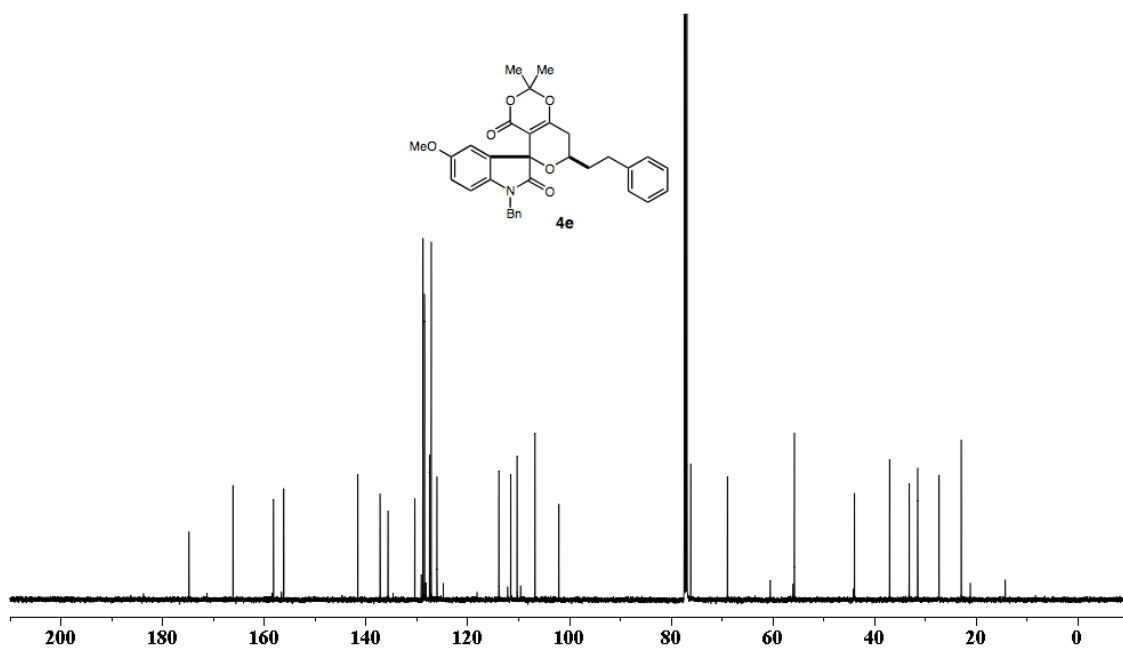

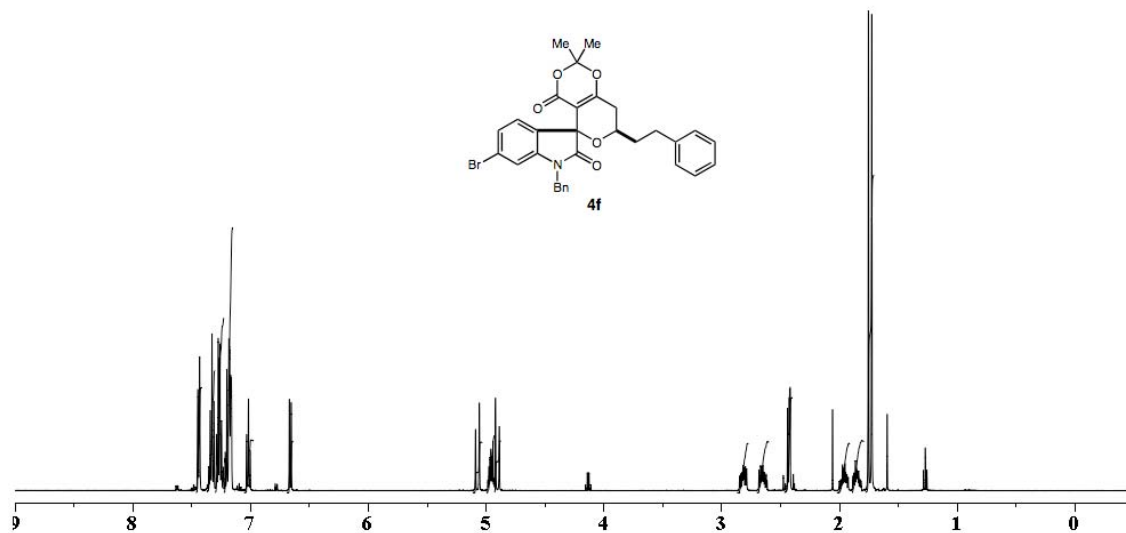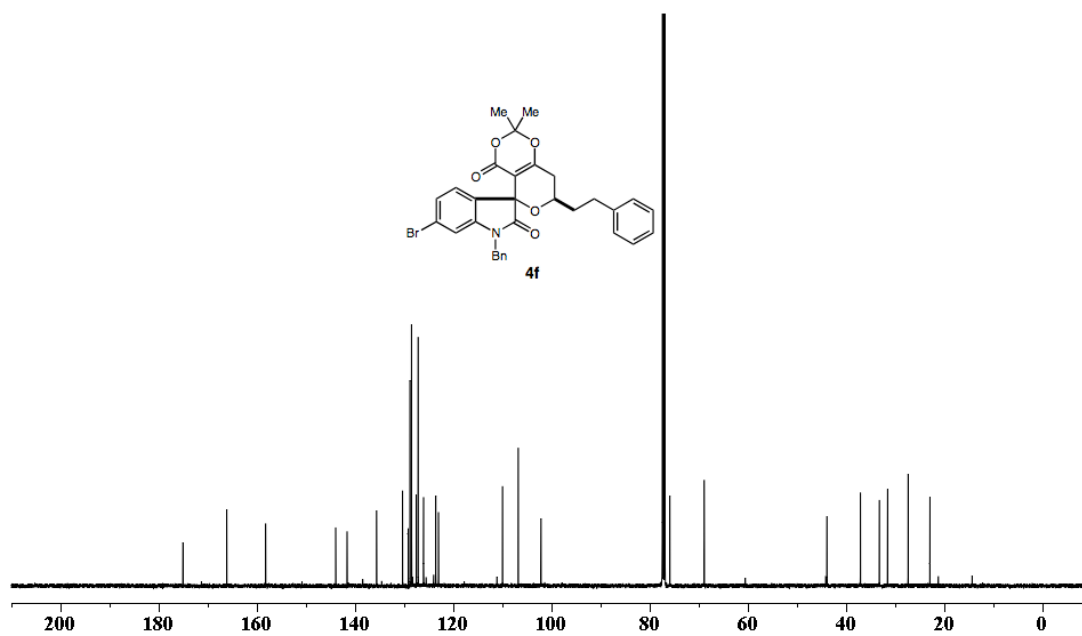

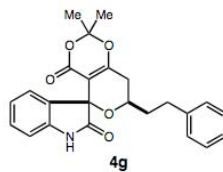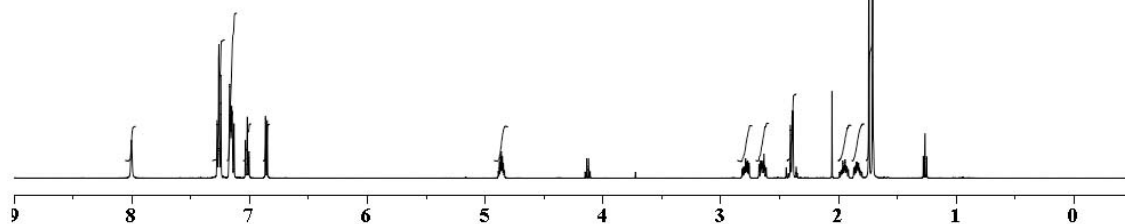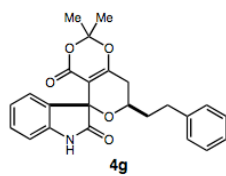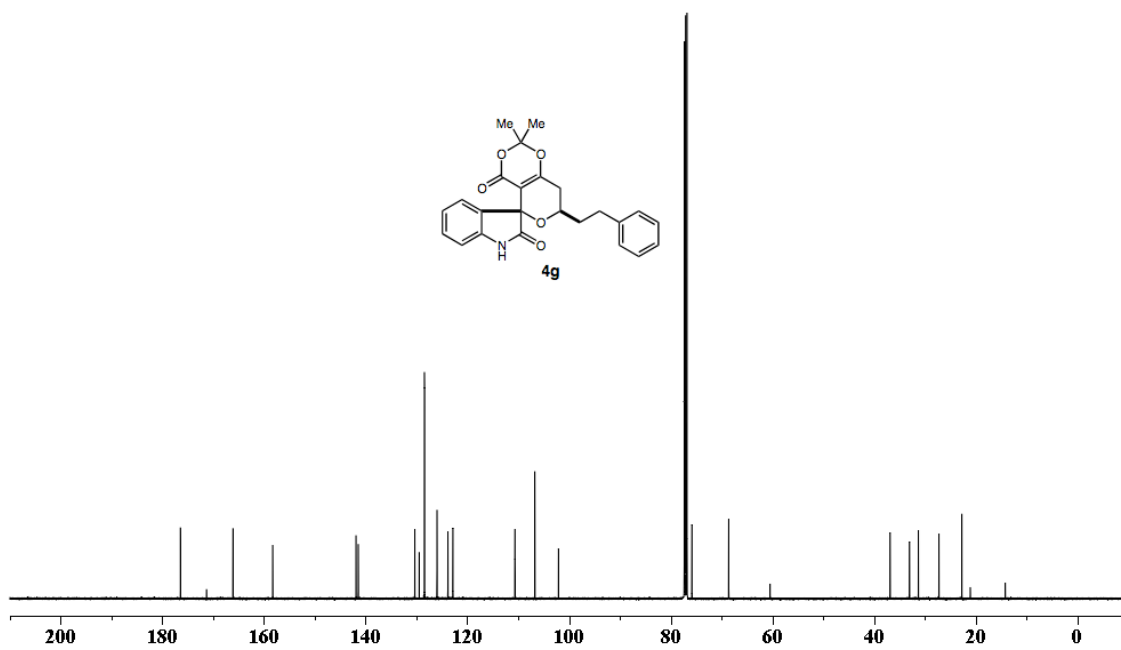

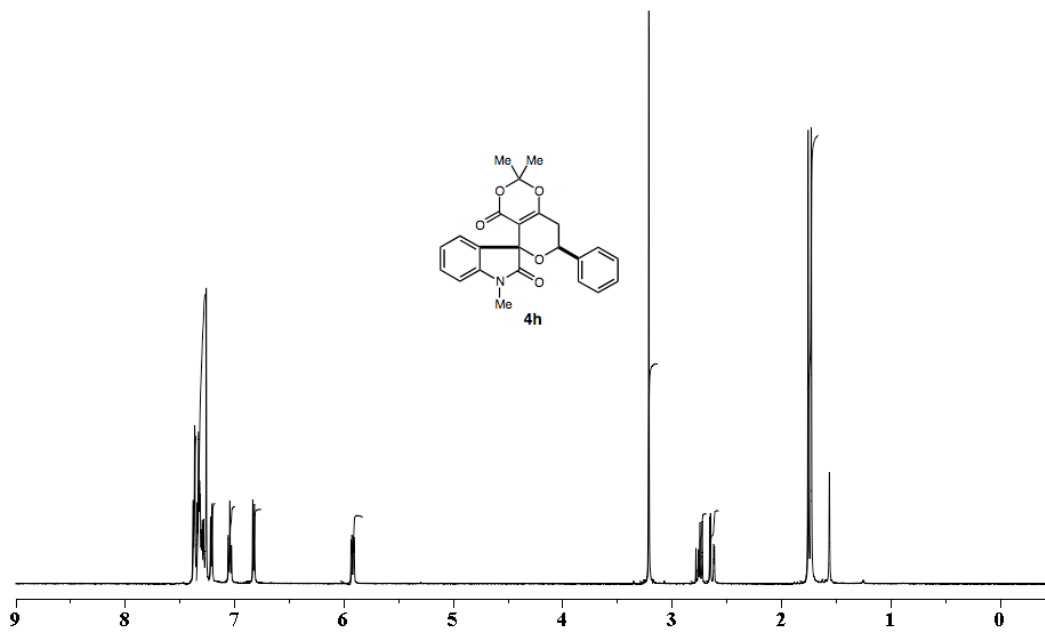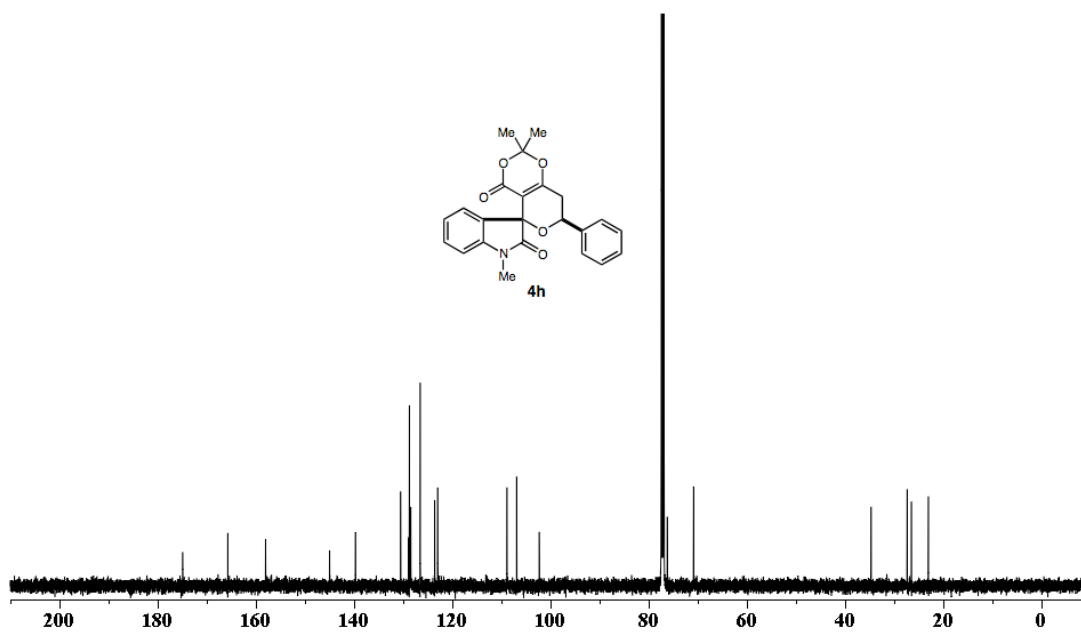

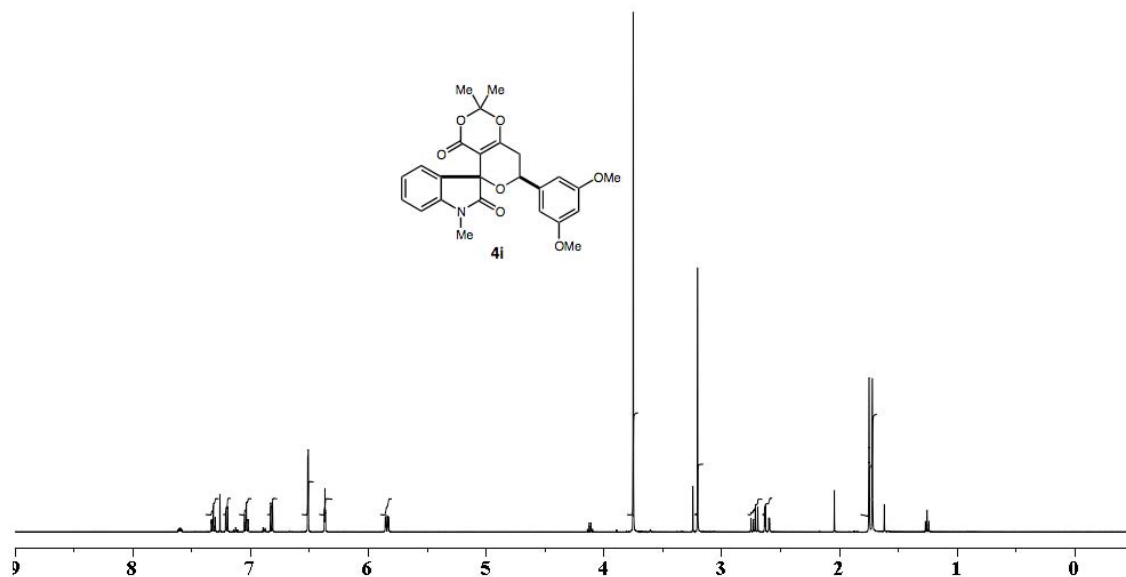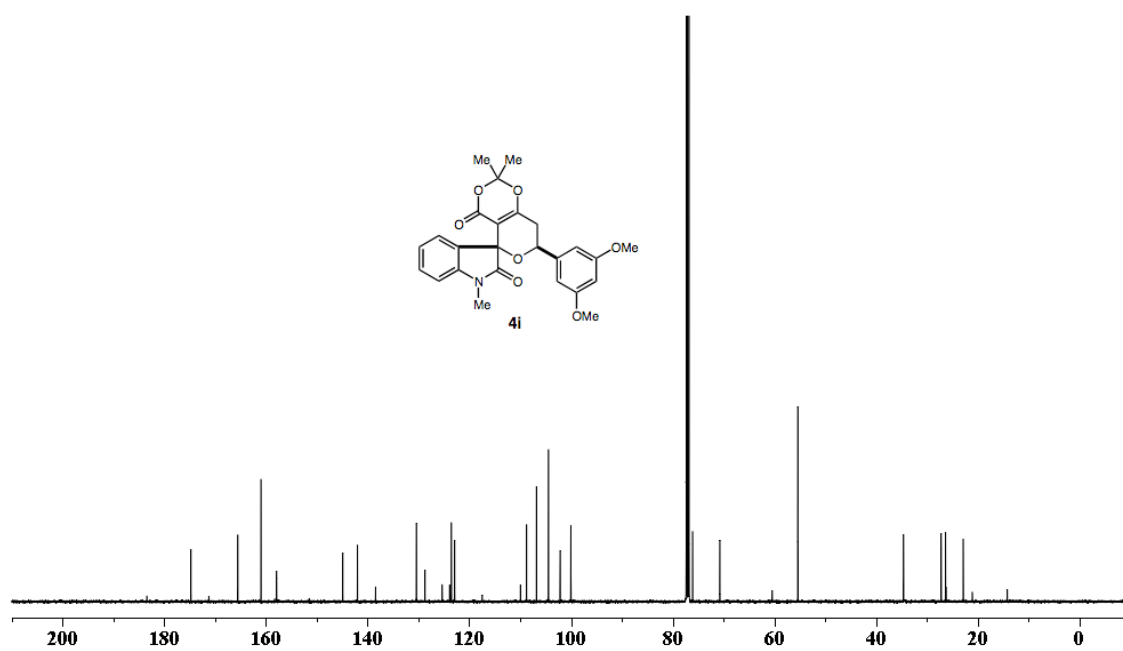

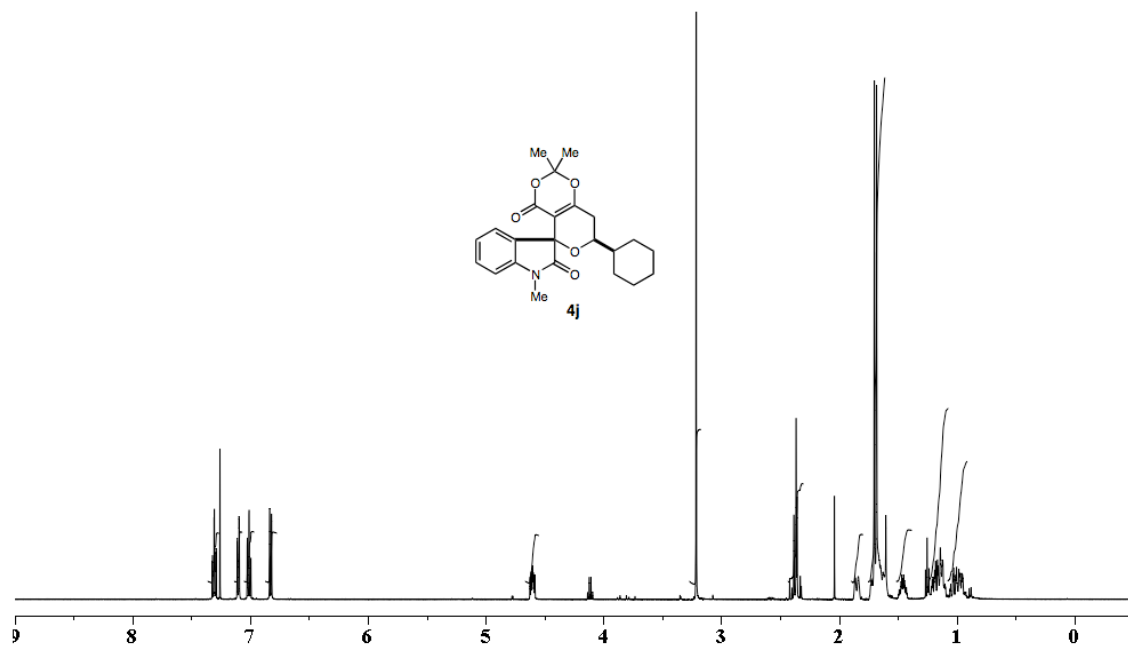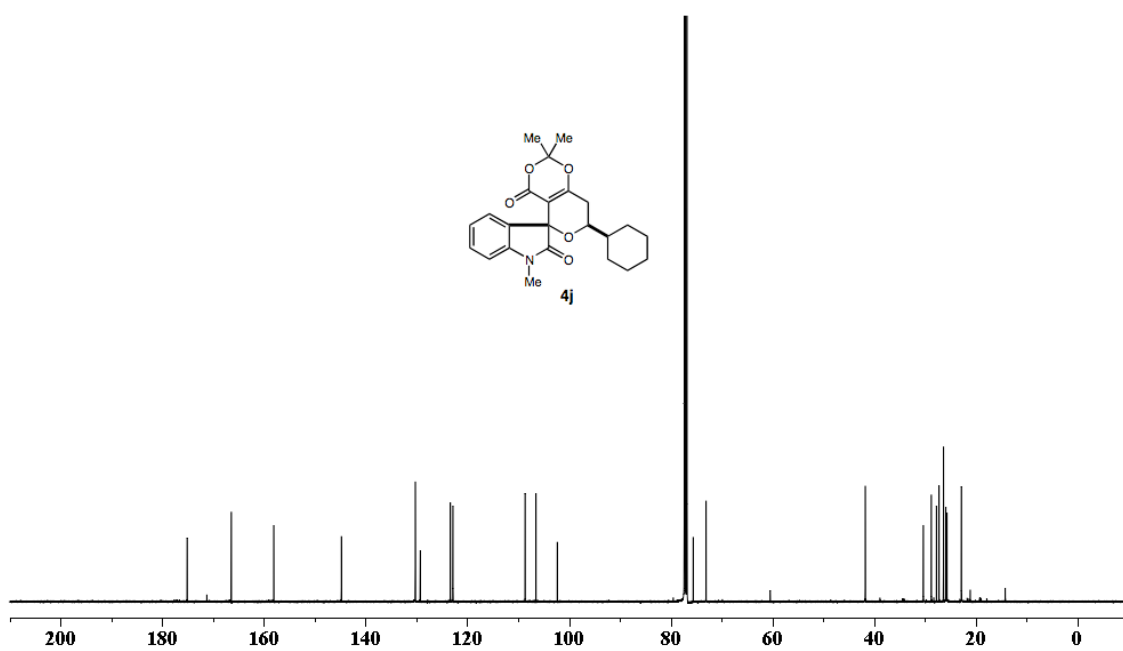

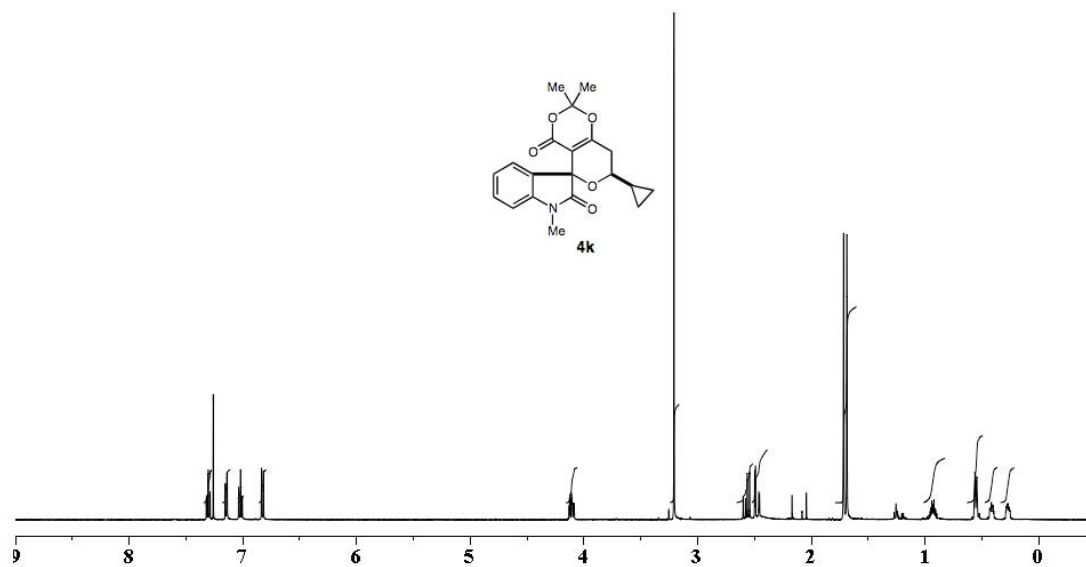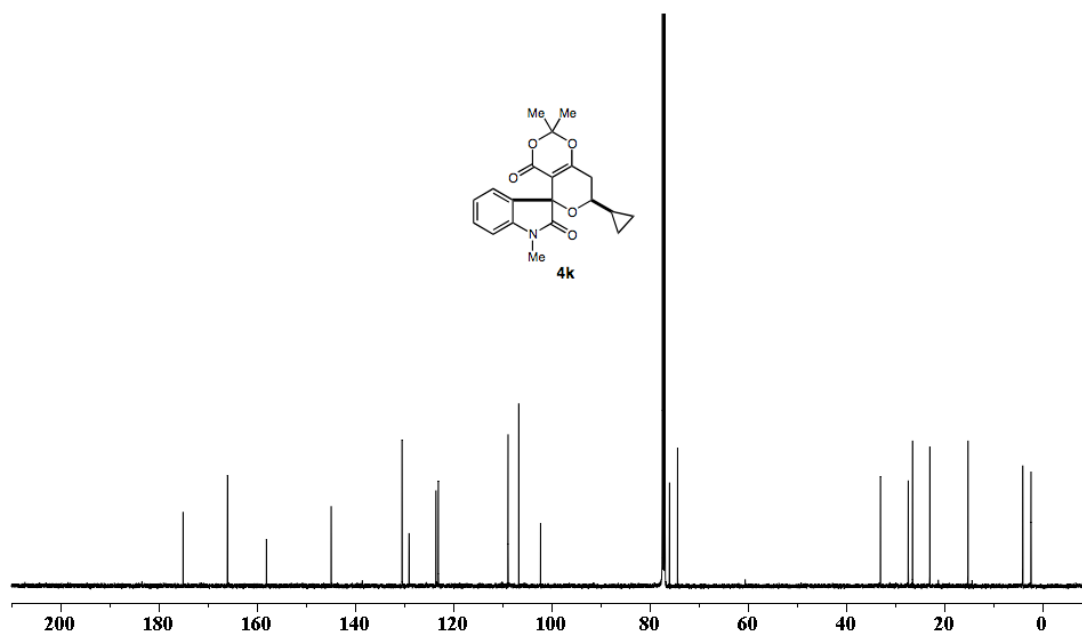

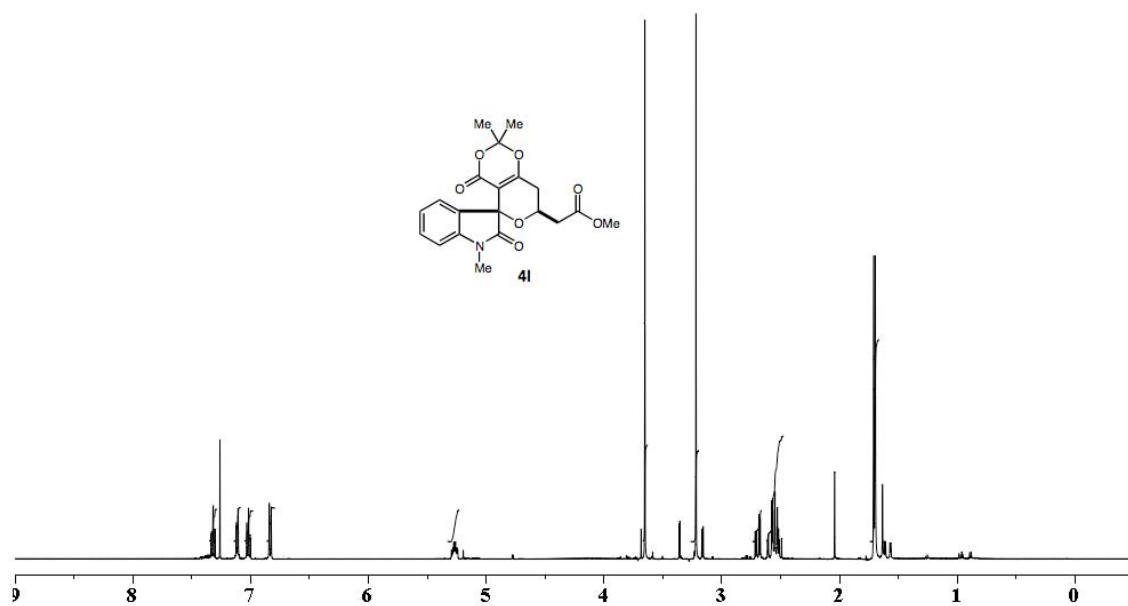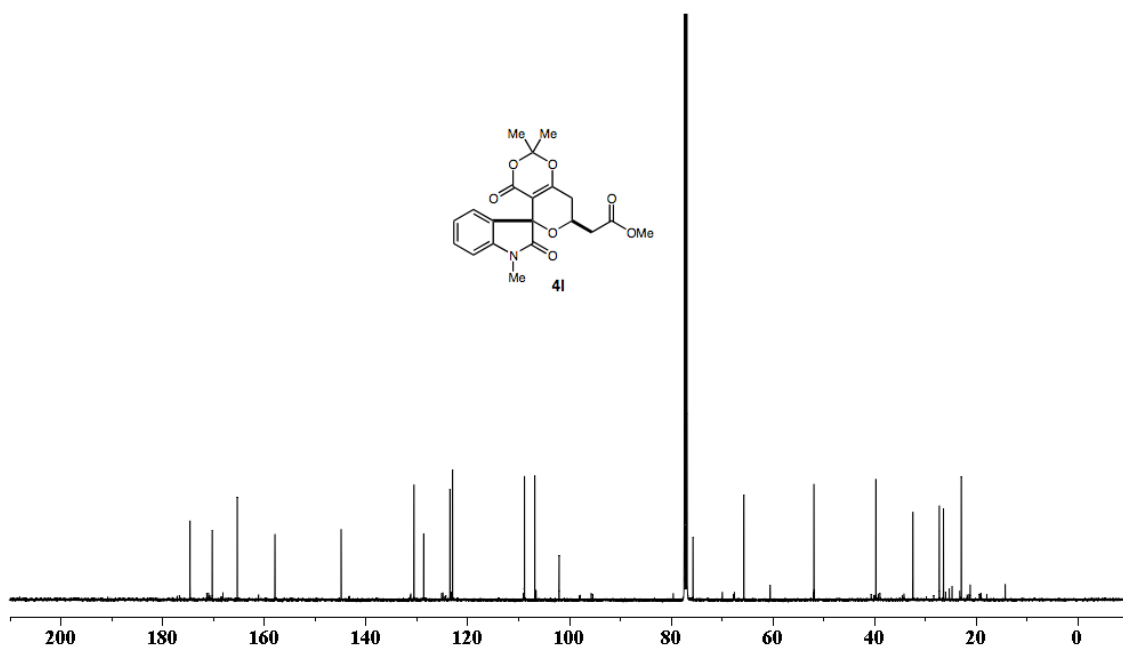



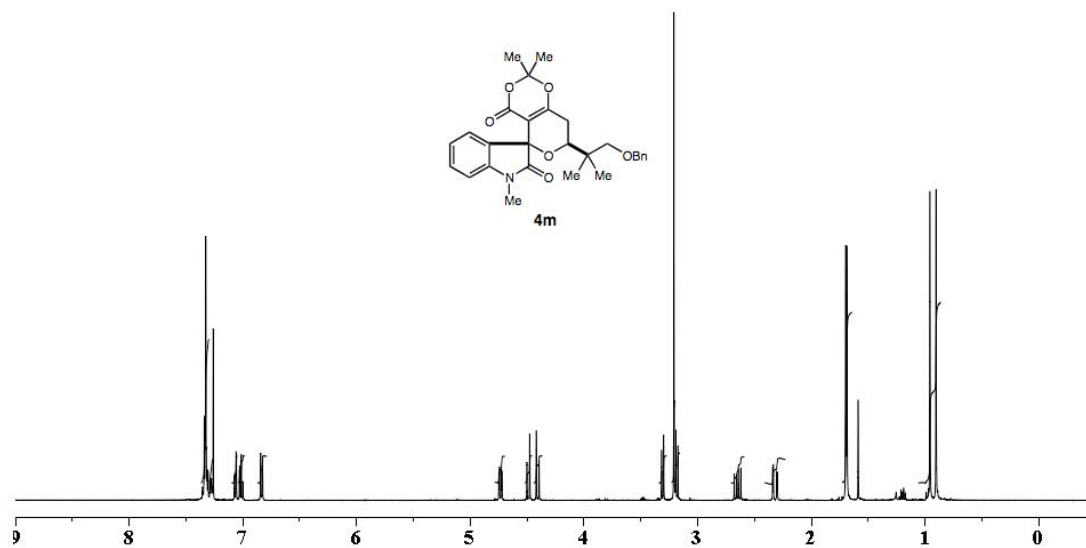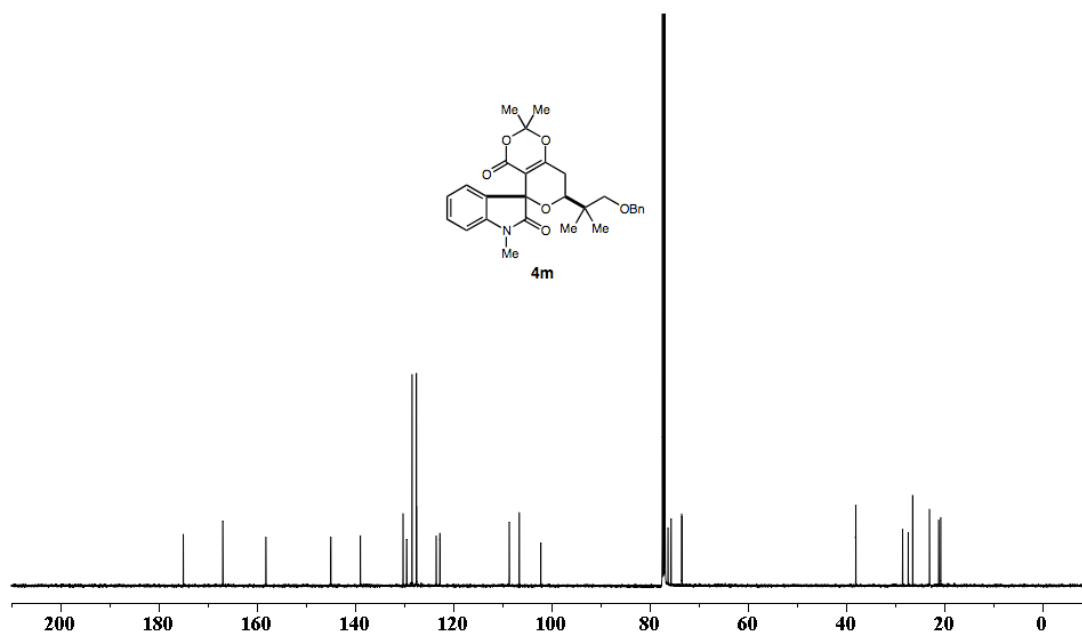

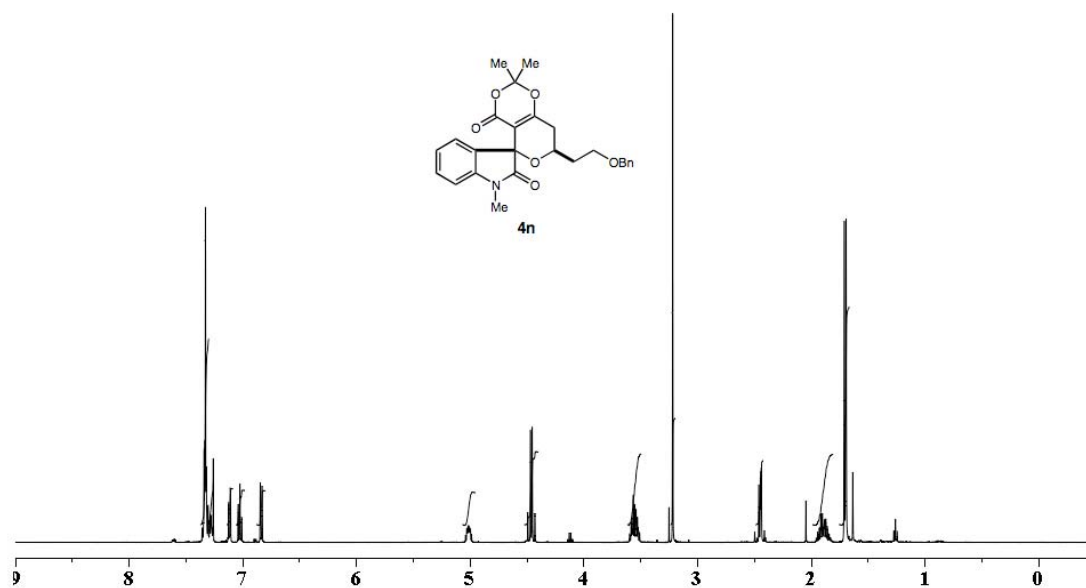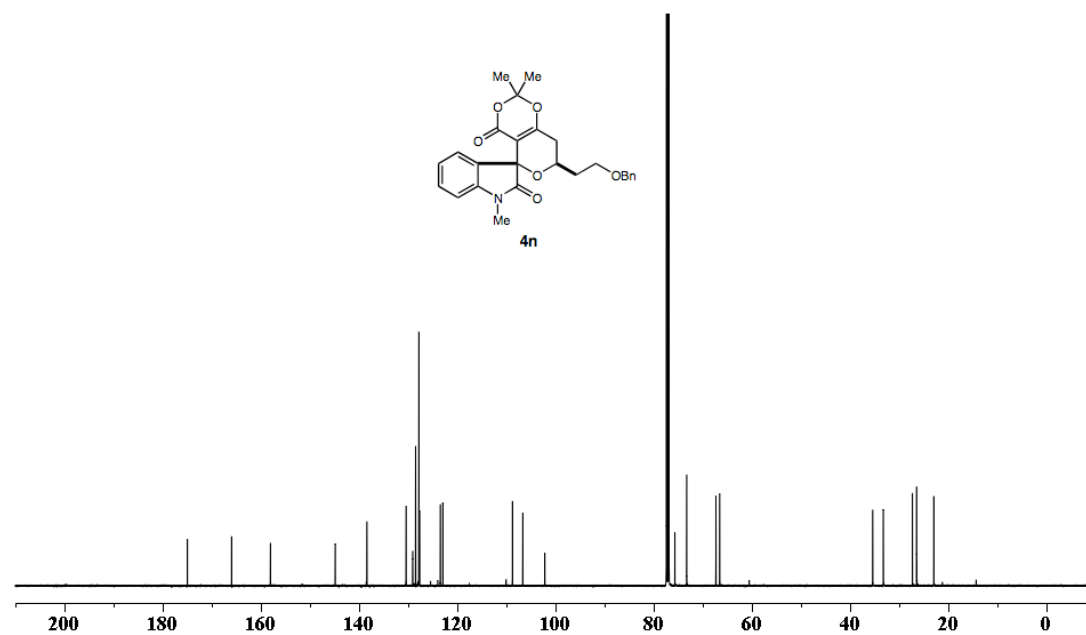

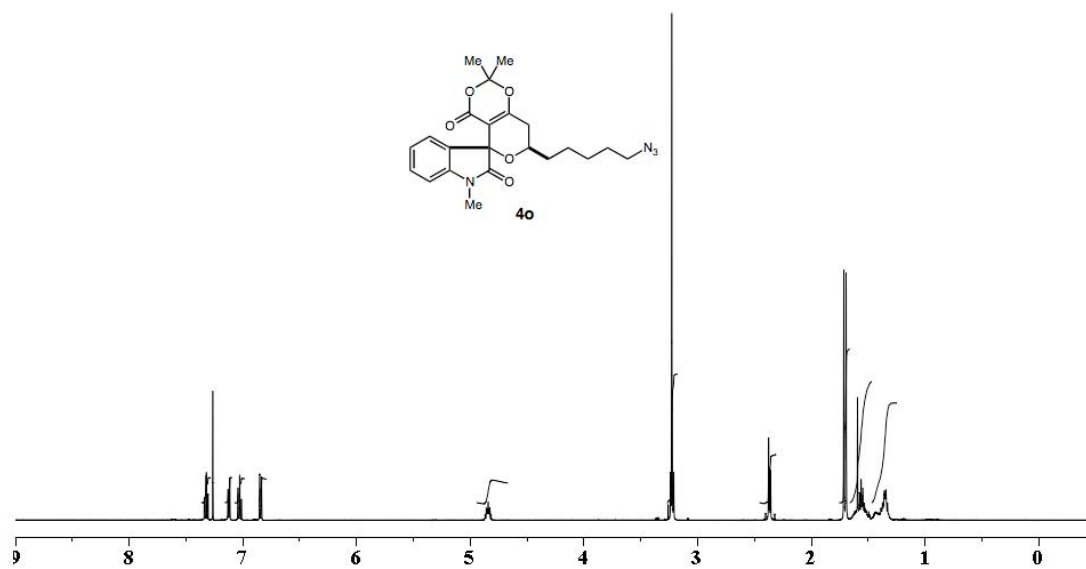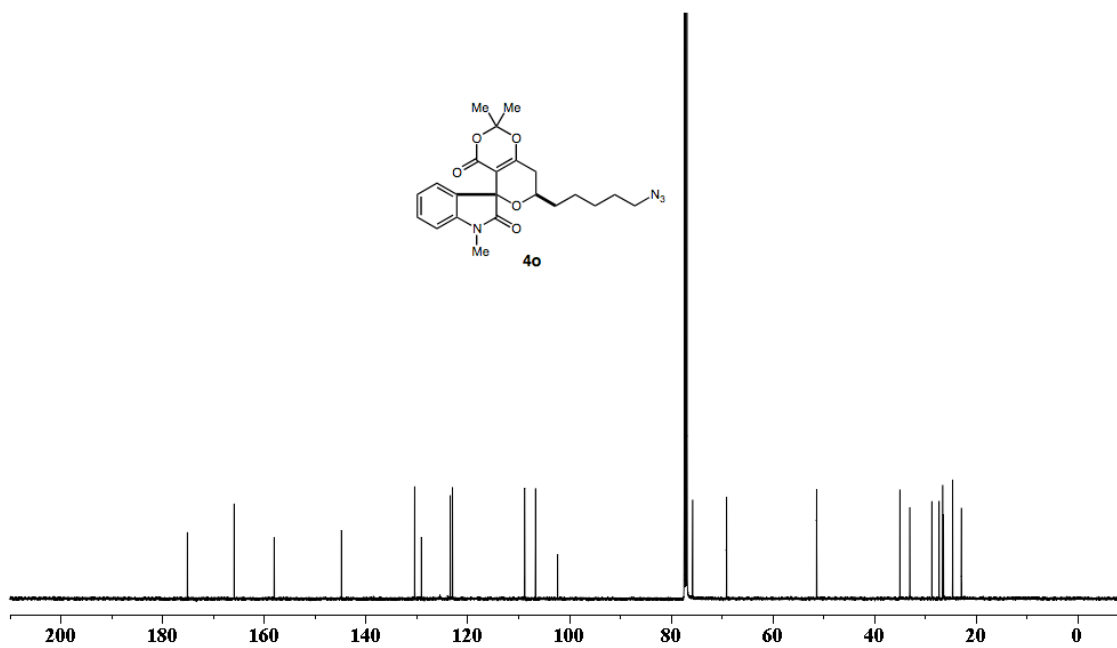

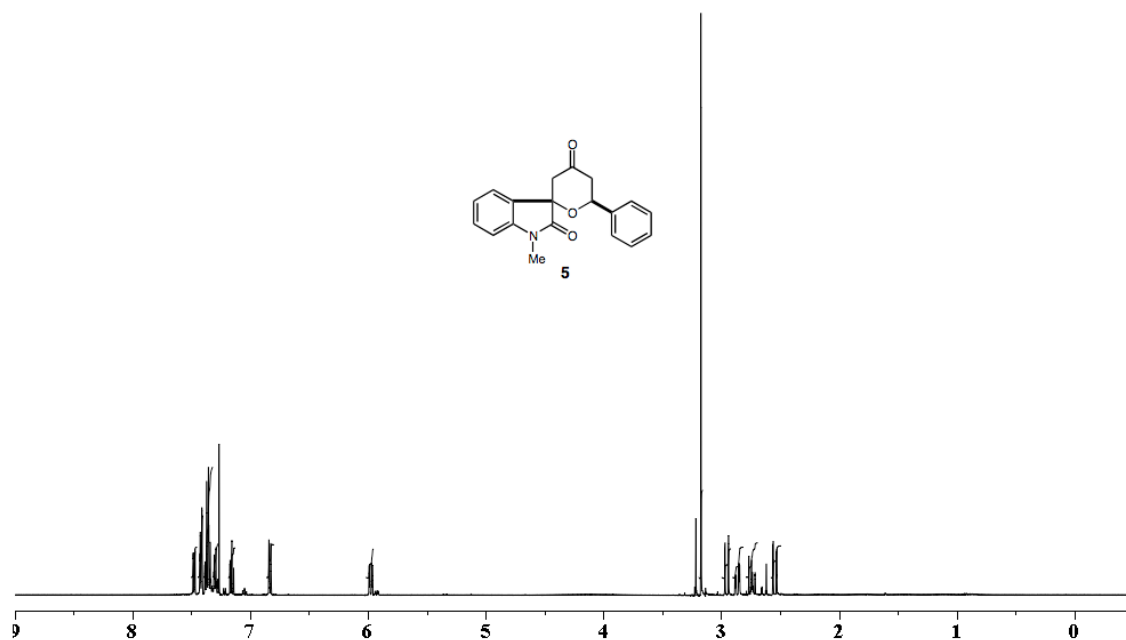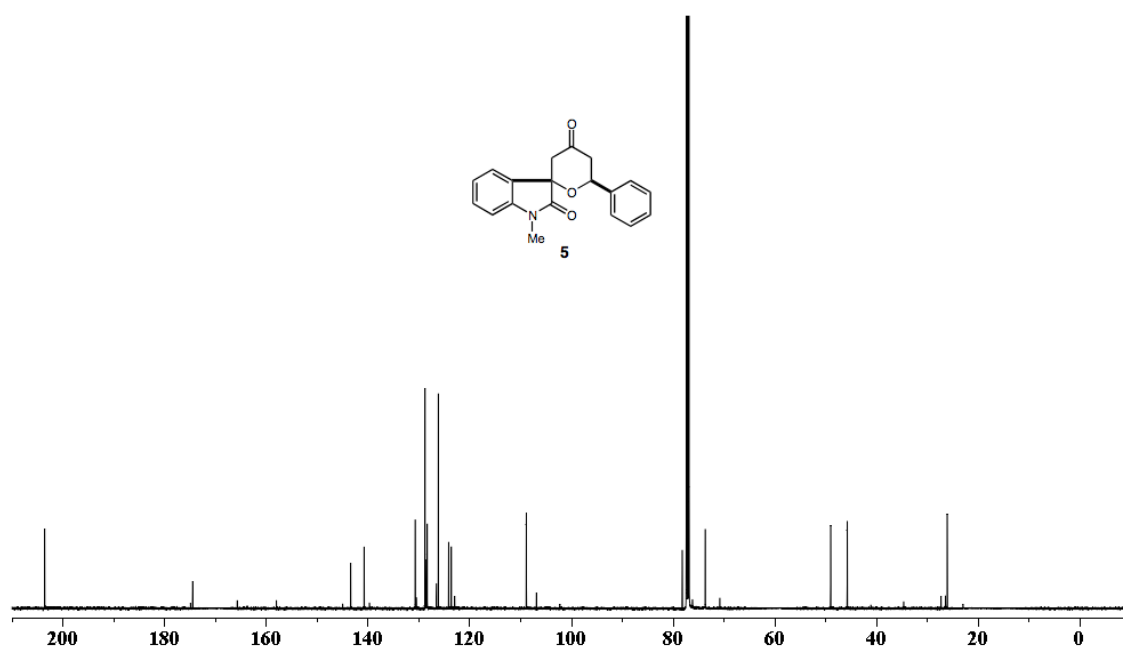

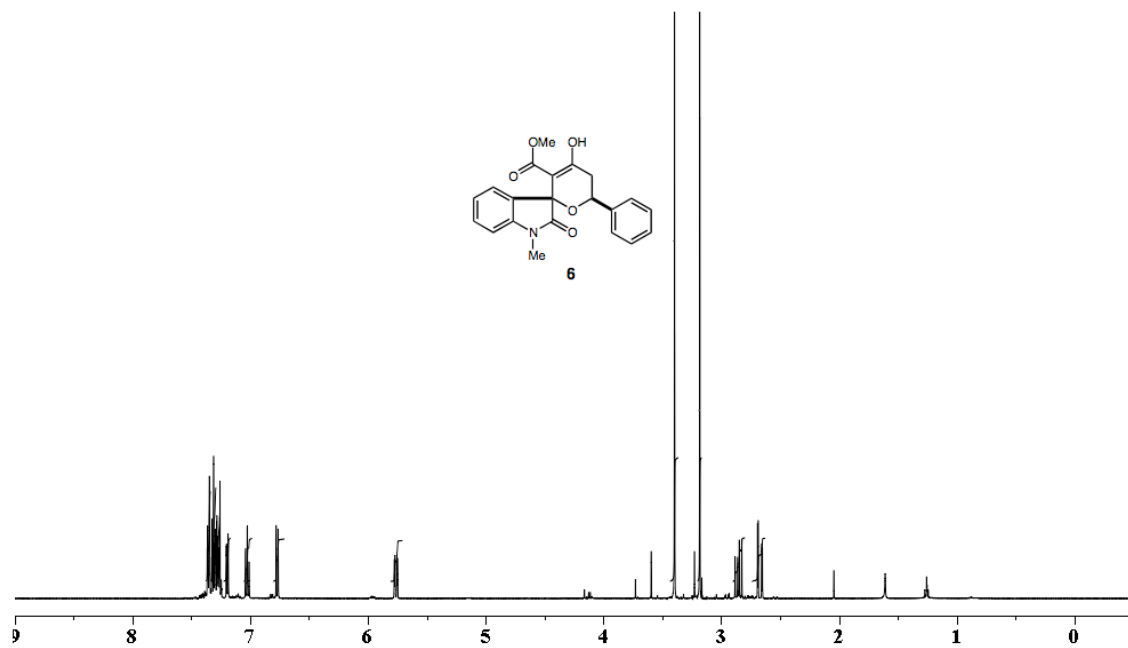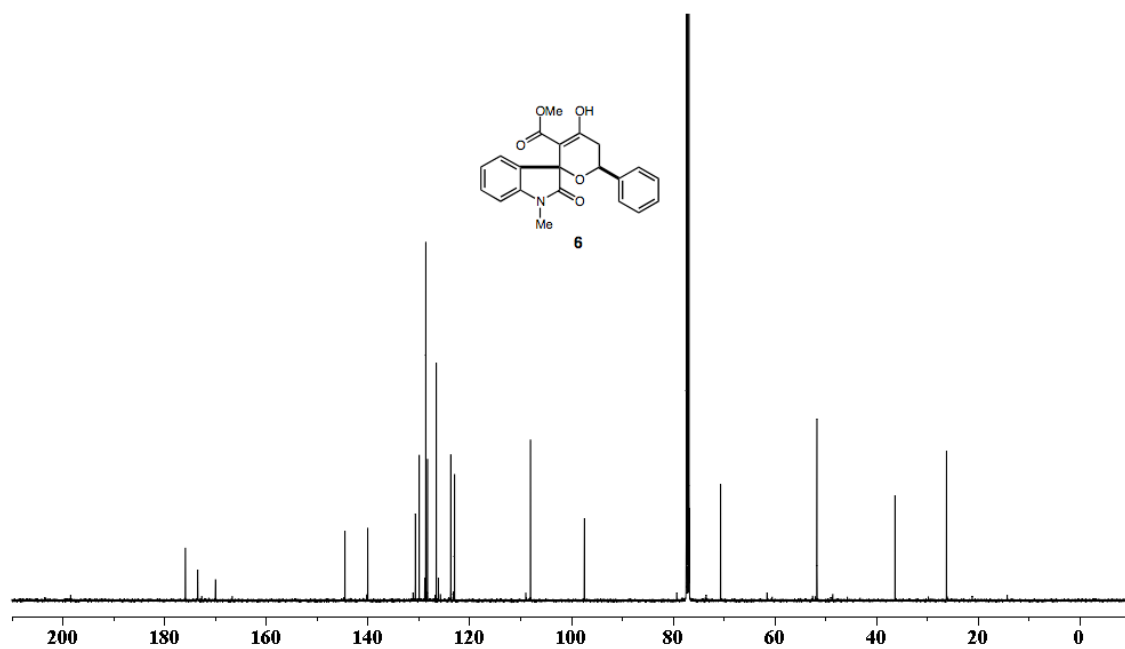

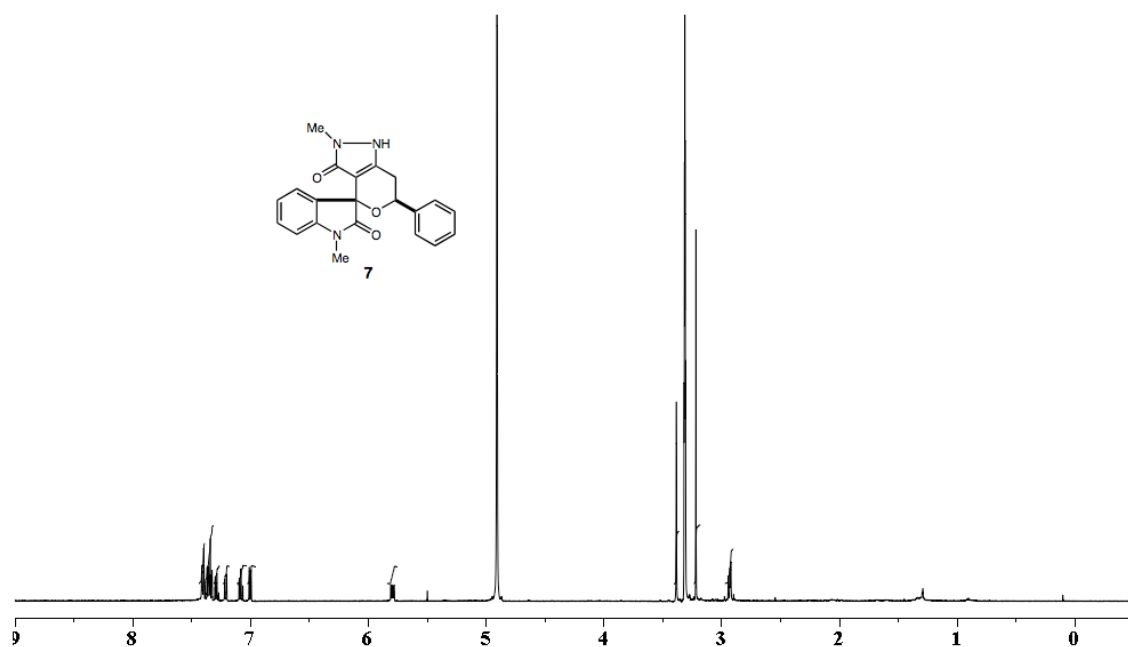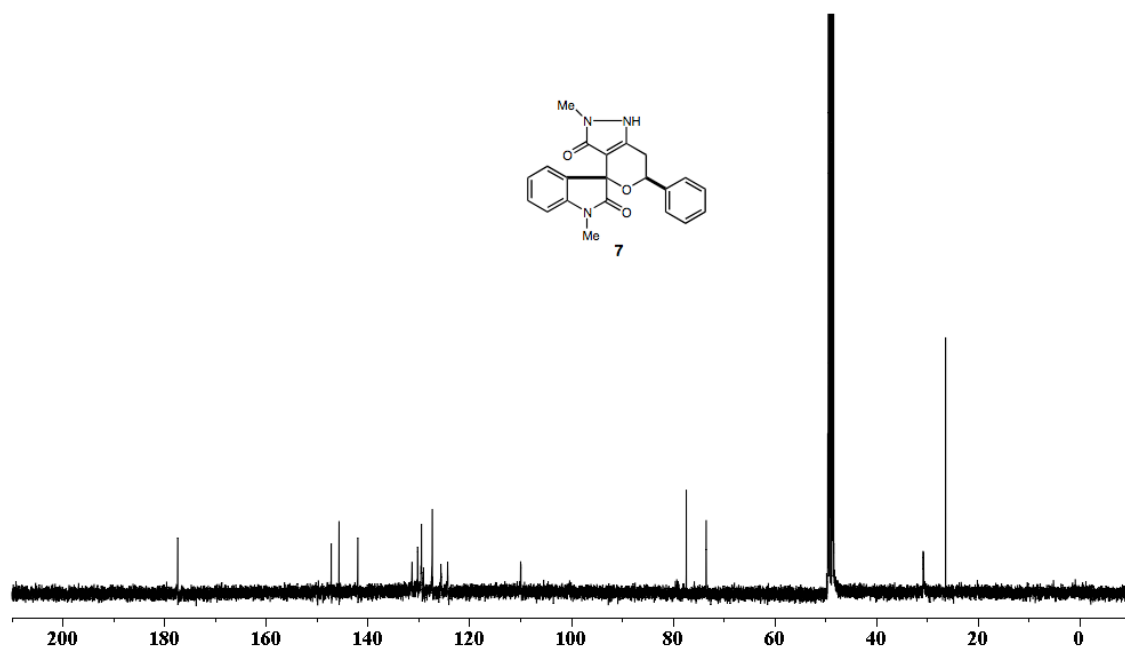

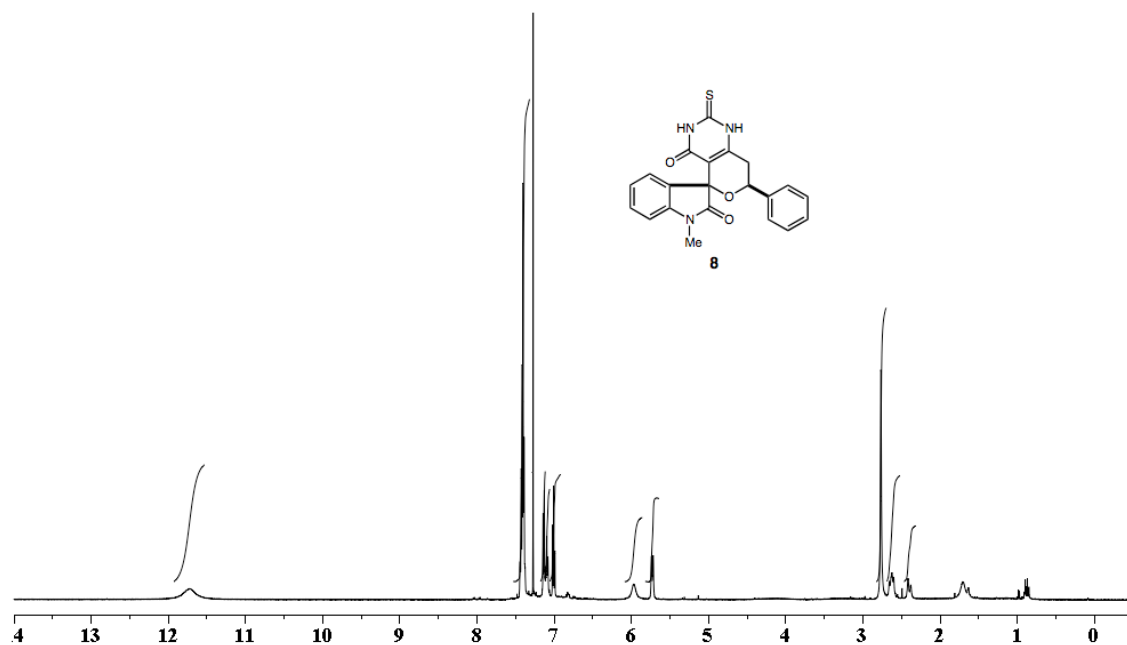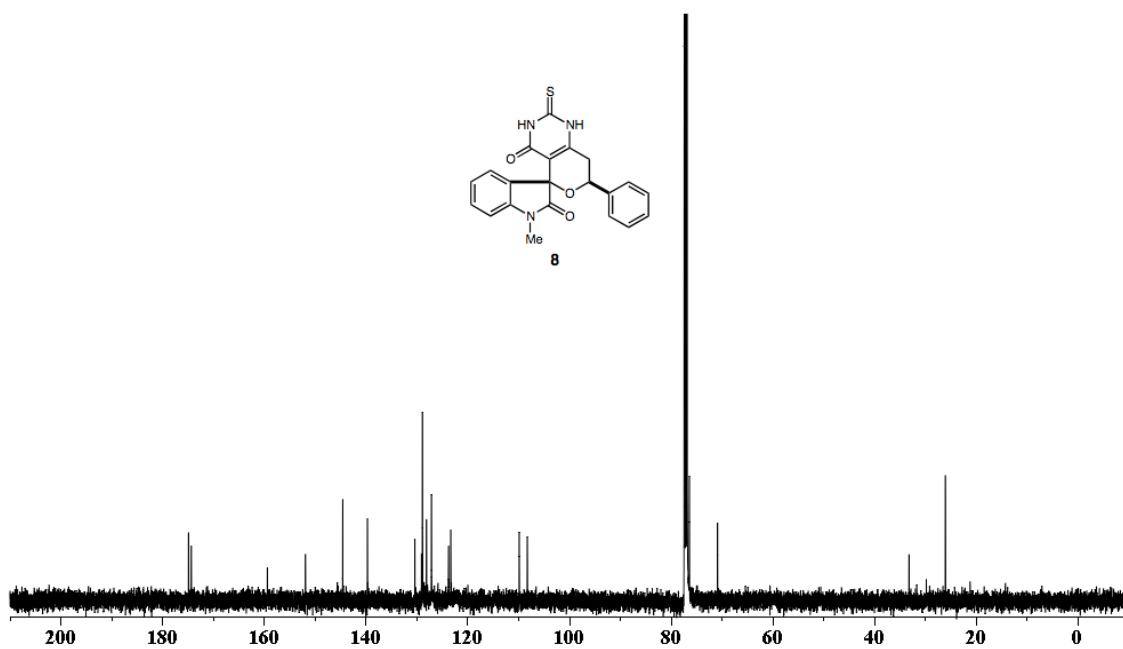

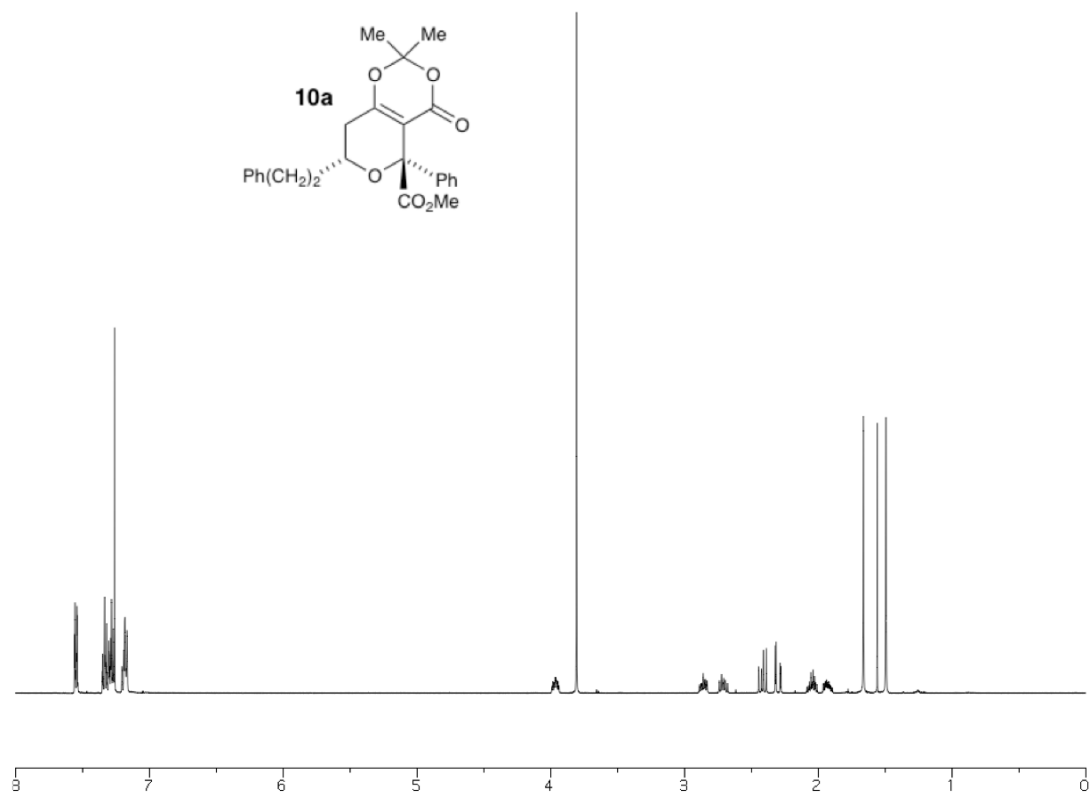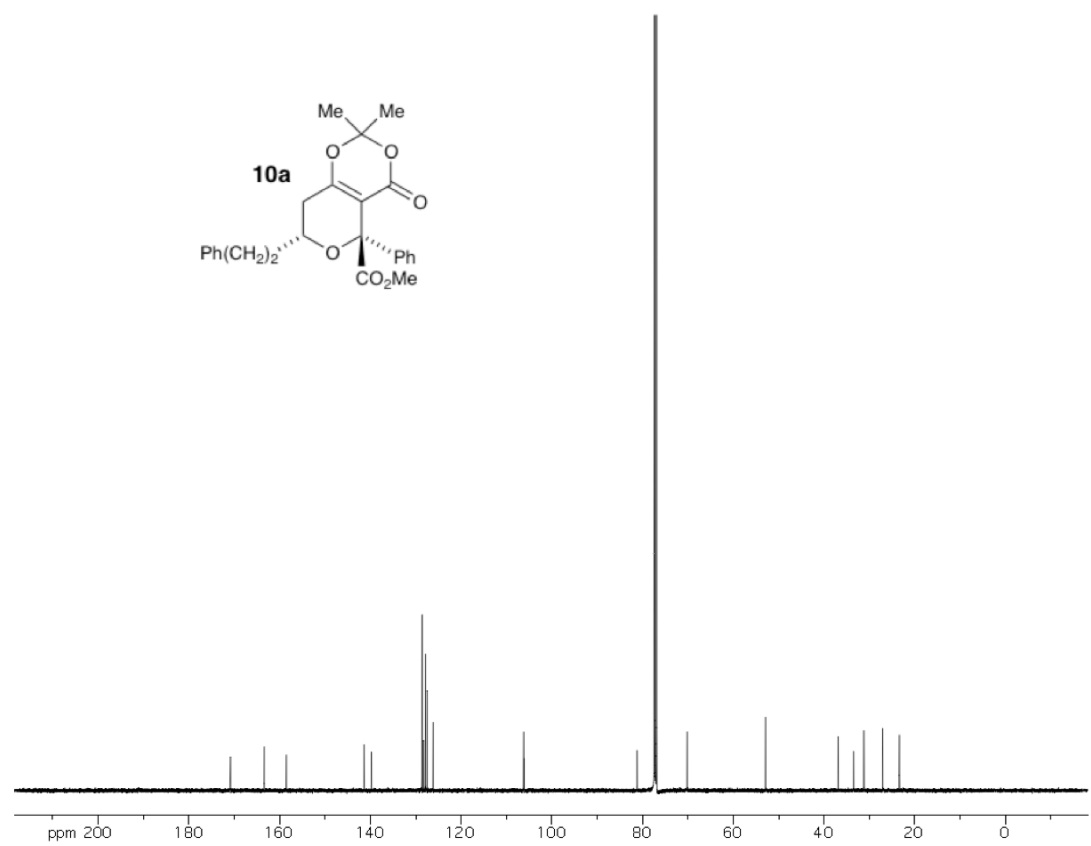



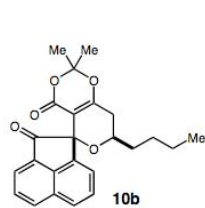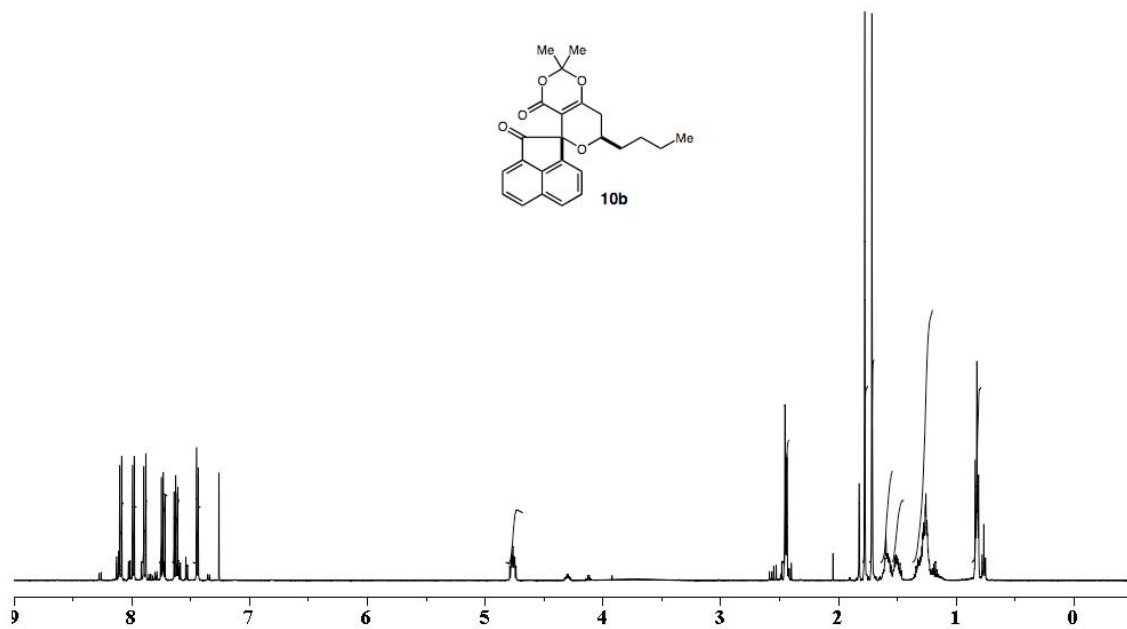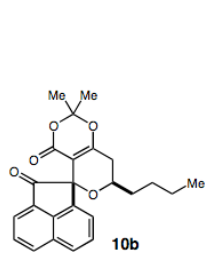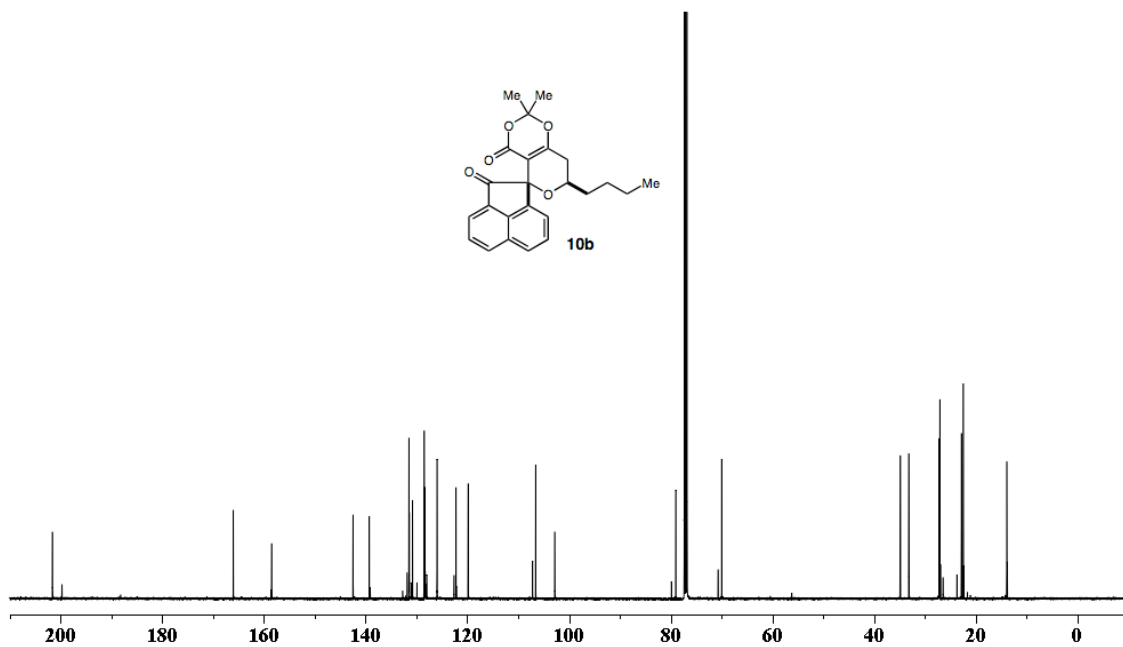

**HPLC Traces of Racemic and Enantioenriched Compounds**

**Racemic 1a:**

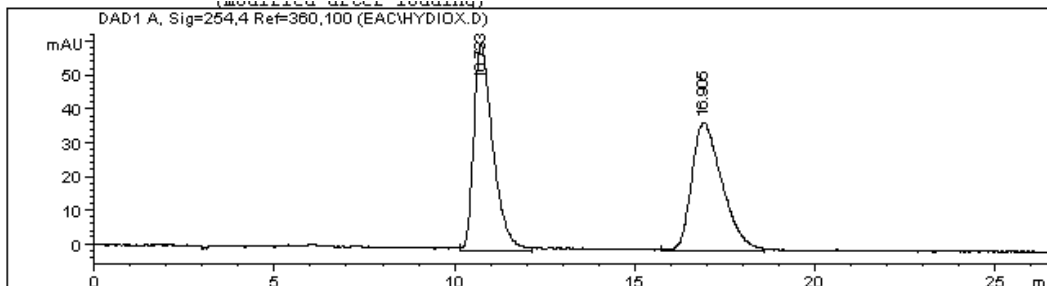

=====  
 Area Percent Report  
 =====

Sorted By : Signal  
 Multiplier : 1.0000  
 Dilution : 1.0000  
 Use Multiplier & Dilution Factor with ISTDs

Signal 1: DAD1 A, Sig=254,4 Ref=360,100

| Peak # | RetTime [min] | Type | Width [min] | Area [mAU*s] | Height [mAU] | Area %  |
|--------|---------------|------|-------------|--------------|--------------|---------|
| 1      | 10.733        | VV   | 0.5353      | 2257.78271   | 61.07483     | 49.9406 |
| 2      | 16.905        | VV   | 0.7104      | 2263.14990   | 38.13558     | 50.0594 |

Totals : 4520.93262 99.21040

**Racemic 4a:**

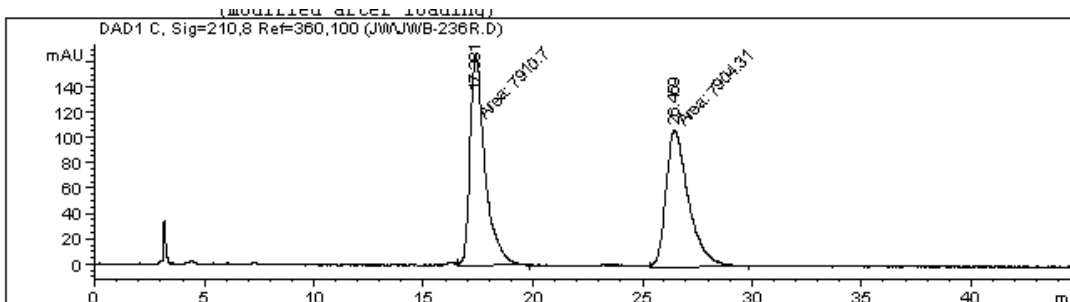

=====  
 Area Percent Report  
 =====

Sorted By : Signal  
 Multiplier : 1.0000  
 Dilution : 1.0000  
 Use Multiplier & Dilution Factor with ISTDs

Signal 1: DAD1 C, Sig=210,8 Ref=360,100

| Peak # | RetTime [min] | Type | Width [min] | Area [mAU*s] | Height [mAU] | Area %  |
|--------|---------------|------|-------------|--------------|--------------|---------|
| 1      | 17.381        | MM   | 0.7904      | 7910.69678   | 166.81557    | 50.0202 |
| 2      | 26.459        | MM   | 1.2115      | 7904.31299   | 108.74008    | 49.9798 |

Totals : 1.58150e4 275.55565

**Enantioenriched 1a:**

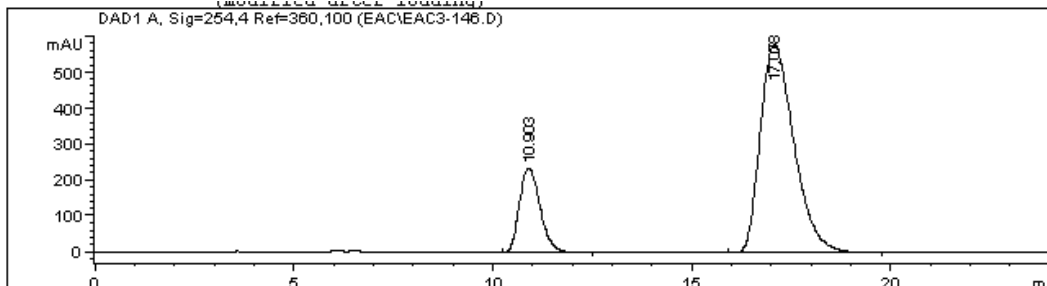

=====  
 Area Percent Report  
 =====

Sorted By : Signal  
 Multiplier : 1.0000  
 Dilution : 1.0000  
 Use Multiplier & Dilution Factor with ISTDs

Signal 1: DAD1 A, Sig=254,4 Ref=360,100

| Peak # | RetTime [min] | Type | Width [min] | Area [mAU*s] | Height [mAU] | Area %  |
|--------|---------------|------|-------------|--------------|--------------|---------|
| 1      | 10.903        | VB   | 0.5817      | 8595.79297   | 235.55894    | 20.0497 |
| 2      | 17.078        | VB   | 0.9036      | 3.42767e4    | 579.93500    | 79.9503 |

Totals : 4.28725e4 815.49394

**Enantioenriched 4a**

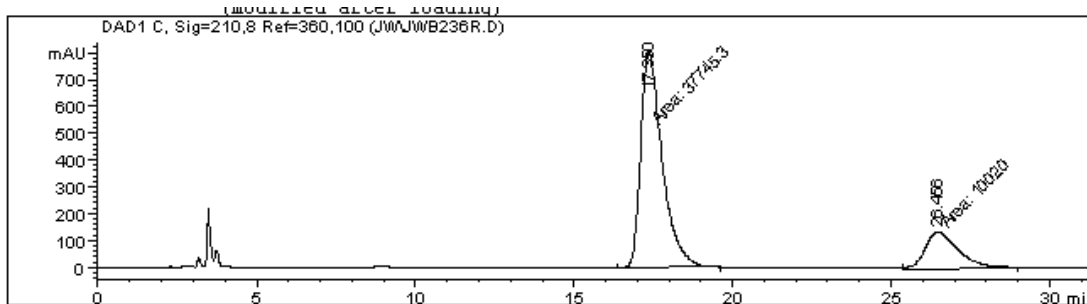

=====  
 Area Percent Report  
 =====

Sorted By : Signal  
 Multiplier : 1.0000  
 Dilution : 1.0000  
 Use Multiplier & Dilution Factor with ISTDs

Signal 1: DAD1 C, Sig=210,8 Ref=360,100

| Peak # | RetTime [min] | Type | Width [min] | Area [mAU*s] | Height [mAU] | Area %  |
|--------|---------------|------|-------------|--------------|--------------|---------|
| 1      | 17.350        | MM   | 0.7889      | 3.77453e4    | 797.42822    | 79.0225 |
| 2      | 26.456        | MM   | 1.2182      | 1.00200e4    | 137.09073    | 20.9775 |

Totals : 4.77653e4 934.51895

**Determination of Absolute Stereochemistry of 4h**

The absolute stereochemistry of **4h** was determined by the X-ray diffraction. Pure material was obtained by recrystallization from dichloromethane.

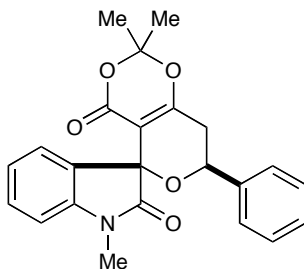

X-ray crystal structure of (3,7'-*cis*)-1,2,2'-trimethyl-7'-phenyl-7,8'-dihydro-4'*H*-spiro[indoline-3,5'-pyrano[4,3-*d*][1,3]dioxine]-2,4'-dione **4h**:

X-ray diffraction was performed at  $-120\text{ }^{\circ}\text{C}$  and raw frame data were processed using SAINT. Molecular structure was solved using direct methods and refined by F2 by full-matrix least-squares techniques. The GOF = 1.06 for 265 variables refined to  $R_1 = 0.032$  for 3371 reflections with  $I > 2\sigma(I)$ . There was no absorption correction. The flack parameter was 0.0. Further information is contained in the CCDC file 803846.

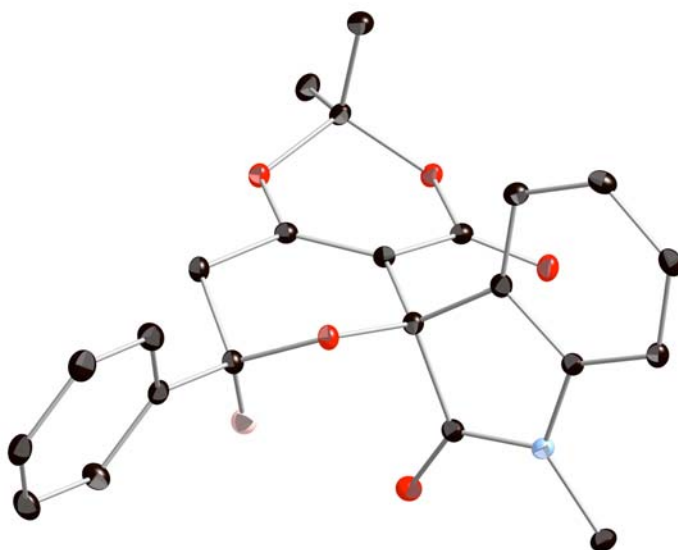

### Determination of Absolute Stereochemistry of **10b**

The relative stereochemistry of **10b** (the minor diastereomer from the reaction) was determined by the X-ray diffraction. Pure material was obtained by recrystallization from diethyl ether/ethyl acetate.

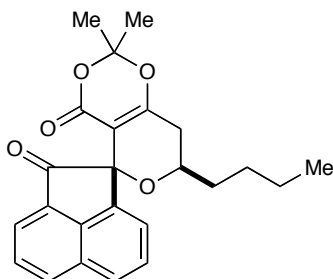

X-ray crystal structure of (1,7'-*cis*)-7'-butyl-2',2'-dimethyl-7',8'-dihydro-2*H*,4'*H*-spiro[acenaphthylene-1,5'-pyrano[4,3-*d*][1,3]dioxine]-2,4'-dione **10b**:

X-ray diffraction was performed at  $-120\text{ }^{\circ}\text{C}$  and raw frame data were processed using SAINT. Molecular structure was solved using direct methods and refined by F2 by full-matrix least-squares techniques. The GOF = 1.03 for 265 variables refined to  $R1 = 0.042$  for 2521 reflections with  $I > 2\sigma(I)$ . There was no absorption correction. The flack parameter was 0.0. Further information is contained in the CCDC file 803480.

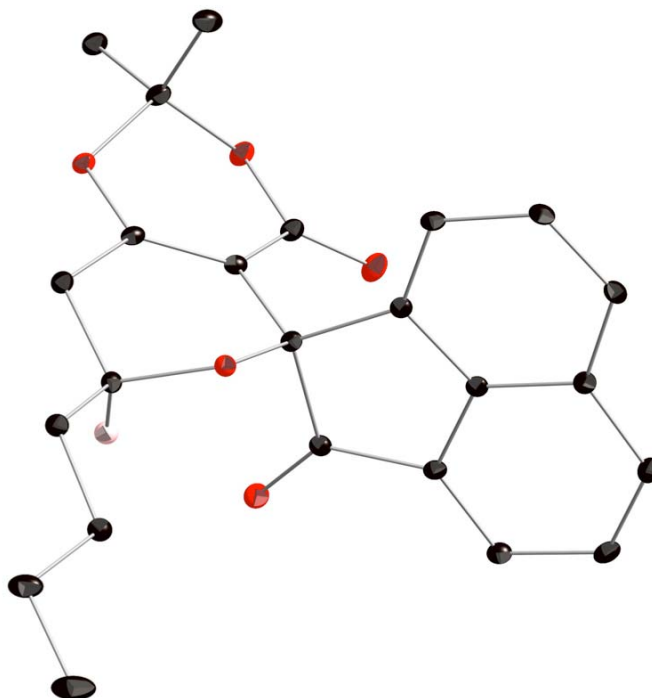

Supplement: NIHMS297873-supplement-2_si_002.pdf [file NIHMS297873-supplement-2_si_002.pdf]
